# Supplementary material for: What determines patient satisfaction with surgery? A prospective cohort study of 4709 patients following total joint replacement
Source: PubMed Central journal article supplement — BMJ Open. 2013 Apr 9;3(4):e002525. doi: 10.1136/bmjopen-2012-002525 (PMC3641464; doi:10.1136/bmjopen-2012-002525), 2013-04-09
Supplement: bmjopen-2012-002525.draft_revisions.pdf [file bmjopen-2012-002525.draft_revisions.pdf]

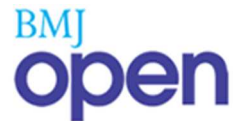

**What determines patient satisfaction with surgery? A  
PROSPECTIVE COHORT STUDY OF 4709 PATIENTS  
FOLLOWING TOTAL JOINT REPLACEMENT**

|                                    |                                                                                                                                                                                                                                                                                                                                                                                                                                        |
|------------------------------------|----------------------------------------------------------------------------------------------------------------------------------------------------------------------------------------------------------------------------------------------------------------------------------------------------------------------------------------------------------------------------------------------------------------------------------------|
| Journal:                           | <i>BMJ Open</i>                                                                                                                                                                                                                                                                                                                                                                                                                        |
| Manuscript ID:                     | bmjopen-2012-002525                                                                                                                                                                                                                                                                                                                                                                                                                    |
| Article Type:                      | Research                                                                                                                                                                                                                                                                                                                                                                                                                               |
| Date Submitted by the Author:      | 20-Dec-2012                                                                                                                                                                                                                                                                                                                                                                                                                            |
| Complete List of Authors:          | Hamilton, David; University of Edinburgh, Orthopaedics<br>Lane, Judith; Queen Margaret University, Physiotherapy<br>Gaston, Paul; NHS Lothian, Orthopaedics and Trauma<br>Patton, James; NHS Lothian, Orthopaedics and Trauma<br>MacDonald, Deborah; University of Edinburgh, Department of Orthopaedics<br>Simpson, Hamish; University of Edinburgh, Department of Orthopaedics<br>Howie, Colin; NHS Lothian, Orthopaedics and Trauma |
| <b>Primary Subject<br>Heading</b>: | Surgery                                                                                                                                                                                                                                                                                                                                                                                                                                |
| Secondary Subject Heading:         | Health policy                                                                                                                                                                                                                                                                                                                                                                                                                          |
| Keywords:                          | SURGERY, ORTHOPAEDIC & TRAUMA SURGERY, Limb reconstruction <<br>ORTHOPAEDIC & TRAUMA SURGERY, Hip < ORTHOPAEDIC & TRAUMA<br>SURGERY, Knee < ORTHOPAEDIC & TRAUMA SURGERY                                                                                                                                                                                                                                                               |
|                                    |                                                                                                                                                                                                                                                                                                                                                                                                                                        |

SCHOLARONE™  
Manuscripts

Only

**What determines patient satisfaction with surgery?**

A PROSPECTIVE COHORT STUDY OF 4709 PATIENTS FOLLOWING TOTAL JOINT REPLACEMENT

Hamilton DF, Lane JV, Gaston P, Patton JT, MacDonald D, Simpson AHRW, Howie CR

Department of Orthopaedics, University of Edinburgh, Edinburgh, EH164SB, UK  
DF Hamilton, Research Fellow; D MacDonald, Research Co-ordinator; AHRW Simpson, Professor of  
Orthopaedics and Trauma

Department of Physiotherapy, Queen Margaret University, Edinburgh, EH21 6UU, UK  
JV Lane, Lecturer

Royal Infirmary of Edinburgh, Little France Crescent, Edinburgh, EH16 4SA, UK  
CR Howie, Consultant Orthopaedic Surgeon; P Gaston, Consultant Orthopaedic Surgeon; JT Patton, Consultant  
Orthopaedic Surgeon

Correspondence to: [d.f.hamilton@ed.ac.uk](mailto:d.f.hamilton@ed.ac.uk)

## Article Summary;

### Article focus

Patient satisfaction rates have been quoted following surgical intervention; and these used to assess the success of interventions.

Clinical care and patient outcomes have improved over recent years, however satisfaction with surgical services has remained constant over this timeframe.

Many factors have been suggested to influence patient satisfaction, however little is known as to what actually determines the satisfaction response.

### Key messages

Our study identifies 5 factors that explain the patient's overall satisfaction following lower limb joint arthroplasty; (1) meeting of pre-operative expectations, (2) the achievement of satisfactory pain relief, (3) patients subjective hospital experience, and to a lesser extent (4) one year Oxford Score and (5) pre-operative Oxford Score.

Factors thought to influence clinical outcome scores (PROMS) such as age, gender and co-morbidities do not impact upon satisfaction.

Clinical teams currently aim to manage pre-operative expectations and post-operative pain relief. Management of the patient's hospital experience may then be a key factor in optimizing overall patient satisfaction, which has implications for service delivery.

### Strengths and Limitations

This study benefits from a large prospective patient cohort at a single NHS orthopaedic centre with multiple surgeons.

As most patients report high satisfaction with joint arthroplasty there is some doubt as to how discriminating this measure is, and caution has been advised in the use of a standardised instrument for the measurement of satisfaction.

**ABSTRACT**

**Objectives:** To investigate the factors which influence patient report of satisfaction with surgical services and to explore the relationship between the overall level of patient satisfaction, satisfaction with specific facets of outcome and measured clinical outcomes (Patient Reported Outcome Measures).

**Design:** Prospective cohort study

**Setting:** Single NHS teaching hospital

**Participants:** 4709 individuals undergoing primary lower limb joint replacement over a four year period (Jan 2006 – Dec 2010)

**Main Outcome Measures:** Overall patient satisfaction scale, clinical outcomes as measured by PROMS (Oxford Hip or Knee Score, SF12), satisfaction with 5 specific aspects of surgical outcome, attitudes towards further surgery, patient demographics, length of hospital stay.

**Results:** Overall patient satisfaction was predicted by; (1) meeting pre-operative expectations [Odds Ratio 2.88 (95% CI, 2.48-3.34)], (2) satisfaction with pain relief [2.68 (2.26-3.17)], (3) satisfaction with the hospital experience [1.4 (1.17-1.56)], (4) one year [1.07 (1.05-1.10)] and (5) pre-operative [0.96 (0.93-0.98)] Oxford Scores. These 5 factors contributed to a model that was able to correctly predict 97% of the variation in overall patient satisfaction response. The factors having the greatest effect were the degree to which the patient's expectations were met and the satisfaction with pain relief, whereas the Oxford Scores carried little weight in the regression algorithm. Various factors previously reported to influence clinical outcomes; patient age, gender, co-morbidities, length of post-operative hospital stay, mental health, ability to perform heavy activities and whether the hip or knee joint was replaced did not help explain variation in overall patient satisfaction.

**Conclusions:** Three factors broadly determine the patient's overall satisfaction following lower limb joint arthroplasty; meeting pre-operative expectations, achieving satisfactory pain relief, and a satisfactory hospital experience. Pain relief and pre-operative expectations are managed by clinical teams; however a fractured access to surgical services also impacts on the patient's hospital experience which reduces overall satisfaction. In the absence of complications, how we deliver healthcare may be of key importance as well as the specifics of what we deliver. With the political importance of patient satisfaction gaining prominence, this has clear implications for units providing surgical services.

1  
2  
3 Satisfaction with NHS surgical services has recently declined<sup>1</sup> despite more rapid access to, and  
4 fewer measurable complications from surgical care. There are few procedures or treatments where  
5 the monitoring of outcomes and satisfaction has been consistent enough to investigate this  
6 apparent paradox. Joint replacement is an example of a high volume service that has been closely  
7 monitored over recent years.  
8  
9  
10

11 Traditionally, clinical success has been measured by lack of complications or by specific clinical  
12 parameters, e.g. ranges of motion or blood pressure control. More recently, clinical outcomes have  
13 been assessed by patient reported outcome measures (PROMS). Despite the many studies on the  
14 clinical outcome of joint arthroplasty, very few assess overall patient satisfaction with outcome<sup>2</sup>. In  
15 the few that have, the majority of patients are reported to be satisfied with the outcome of their hip  
16 or knee replacement; though consistent reports of 10-20% dissatisfaction with joint arthroplasty  
17 persist<sup>2-6</sup>. Patient reported satisfaction is perhaps the more important criterion of success. This is  
18 well recognised in service industries, though remains a nebulous concept in clinical care. A number  
19 of authors have suggested various factors that may influence satisfaction with arthroplasty, such as  
20 post-operative pain or joint stiffness, though our current understanding as to why some patients are  
21 satisfied and others are not remains limited<sup>6-8</sup>. Indeed some patients reporting a bad clinical  
22 outcome, in terms of pain and function, may report good levels of satisfaction with their surgical  
23 outcome and vice versa<sup>2</sup>. Clearly satisfaction is a broad concept that encompasses more than clinical  
24 outcome.  
25  
26  
27  
28  
29  
30  
31  
32  
33  
34

35 Our aim was to explore the relationship between patient's level of overall satisfaction, satisfaction  
36 with specific facets of surgical outcome and measured clinical outcomes (Patient Reported Outcome  
37 Measures).  
38  
39  
40  
41  
42

## 43 **METHODS**

44 During a four year period (January 2006 to December 2010) all patients undergoing lower limb joint  
45 replacement at a single hospital were entered into a prospectively collected arthroplasty database,  
46 for which regional ethical approval had been obtained (11/AL/0079). The study questionnaire was  
47 completed by 4709 (95%) patients. This comprised 2462 patients receiving total hip replacement and  
48 2247 receiving total knee replacement. All data were included in the analysis.  
49  
50  
51  
52  
53

54 All patients completed pre-operative PROM questionnaires, Oxford Hip or Knee Score<sup>9, 10</sup> and  
55 Medical Outcomes Study Short Form 12 (SF-12) health assessment<sup>11</sup>, and were sent postal follow-up  
56 questionnaires at 6 and 12 months post-operation to assess outcome and satisfaction. Procedures  
57  
58  
59  
60

1  
2  
3 were carried out by multiple consultant orthopaedic surgeons and their supervised trainees. All data  
4 was collected independently from the clinical team by the arthroplasty outcomes research unit of  
5 the University of Edinburgh and NHS Lothian.  
6  
7

8  
9 The Oxford Scores consist of 12 questions relating to the patients perceived pain and functional  
10 ability, answered on a Likert scale with values from 0 to 4. The score ranges from 0-48, with overall  
11 score calculated from the responses to the 12 questions. A score of 0 is the worst possible outcome  
12 suggesting severe symptoms and dysfunction, while 48 is the best possible outcome. The SF-12  
13 results in two scores, the physical and mental component summary (PCS and MCS) scores. This score  
14 is calculated using norm-based methodology and population mean scores. Both PCS and MCS have a  
15 population mean score of 50 with standard deviation of 10.  
16  
17  
18  
19

20  
21 Pre-operative information was collected as to the patient's age, gender and presence of co-  
22 morbidities. Post-operative length of stay was recorded upon discharge. At 12 months patients were  
23 also asked to rate their overall satisfaction with their operated hip or knee on a 4 point scale (very  
24 satisfied, satisfied, unsure or dissatisfied). Data on satisfaction with 5 specific facets of surgical  
25 outcome were obtained with the following questions, answered on a 6 point scale (excellently, very  
26 well, well, fairly, poorly, don't know); (1) "how well did the surgery relieve the pain in your affected  
27 joint?" (2) "How well did the surgery increase your ability to perform regular activities?" (3) "How  
28 well did the surgery allow you to perform heavy work or sport activities?" (4) "How well did the  
29 surgery meet your expectations?" We then asked our patients to indicate their satisfaction with the  
30 care they received at the hospital with the question (5) "rate your overall hospital experience" using  
31 the response scale; excellent, very good, good, fair, poor or unknown. We also asked a further 2  
32 questions that enquired as to the patient's attitude towards further surgery; (1) "would you have  
33 this operation again if it were required on another joint?" and (2) "would you recommend this  
34 operation to someone else?" (Possible responses: Definitely yes, possibly yes, probably not, certainly  
35 not or not sure). These were included to mimic the modelling done in marketing research, where  
36 return visits are considered a successful outcome.  
37  
38  
39  
40  
41  
42  
43  
44  
45  
46

#### 47 **Statistical analysis**

48  
49 Data were assessed with SPSS version 17 (IBM). Data were not normally distributed and therefore  
50 variables have been presented as median and inter-quartile ranges. The satisfaction score at 1 year  
51 was simplified into a binary variable of whether or not the patient was satisfied with the surgery.  
52 86.6% of patients were either very satisfied or satisfied, and 13.4% were unsure or not satisfied.  
53 Bivariate analysis was undertaken to determine whether differences in outcome were associated by  
54  
55  
56  
57  
58  
59  
60

1  
2  
3 satisfaction status. Logistic regression analysis was then performed to determine the variables  
4 associated with satisfaction at one year. Multivariate modelling, using a stepwise binary building  
5 technique, was employed with predictive variables selected if their bivariate significance was  $p = 0.1$   
6 to accommodate the possibility of variable achieving statistical significance once the confounding  
7 effect of another variable was controlled.  
8  
9  
10

## 11 12 13 14 **RESULTS**

15  
16 Demographic details are described in table 1. Age and gender and length of stay were not  
17 associated with differences in satisfaction, however a significantly higher proportion of the THA  
18 group were satisfied than the TKA group (Table 1,  $\chi^2 = 49.85$ ,  $p < 0.001$ ).  
19  
20

21  
22 All patient reported outcome scores (including pre-operative scores) were significantly greater in the  
23 satisfied group. Satisfaction with the specific aspects of surgical outcome, the hospital experience  
24 and the attitude towards further surgery were all significantly greater ( $p = 0.001$ ) in those who  
25 reported overall satisfaction with outcome.  
26  
27  
28  
29  
30  
31  
32  
33  
34  
35  
36  
37  
38  
39  
40  
41  
42  
43  
44  
45  
46  
47  
48  
49  
50  
51  
52  
53  
54  
55  
56  
57  
58  
59  
60

Table 1: patient demographics and outcomes by satisfaction

| Variable                                                 | Satisfied              | Not satisfied | Sig.    |
|----------------------------------------------------------|------------------------|---------------|---------|
| Age (Median, IQR)                                        | 70.3 (13.8)            | 70.0 (14.4)   | 0.829   |
| Gender                                                   |                        |               | 0.473   |
|                                                          | Female, n = 2354 (87%) | 354 (13%)     |         |
|                                                          | Male, n = 1725 (86%)   | 276 (14%)     |         |
| Joint                                                    |                        |               | <0.001  |
|                                                          | THA, n = 2215 (90.0%)  | 247 (10.0%)   |         |
|                                                          | TKA, n = 1864 (83.0%)  | 383 (17.0%)   |         |
| Number of co-morbidities                                 | 2 (2)                  | 2 (2)         | <0.001  |
| Length of stay (days)                                    | 5 (3)                  | 6 (2)         | < 0.001 |
| <b>Satisfaction with specific facets (median scores)</b> |                        |               |         |
| Pain relief in affected joint                            | excellent              | fair          | < 0.001 |
| Ability to perform activities                            | very good              | fair          | < 0.001 |
| Ability to perform heavy work or sports                  | good                   | poor          | < 0.001 |
| Meeting of expectations                                  | very good              | poor          | < 0.001 |
| Rating of hospital experience                            | very good              | good          | < 0.001 |
| <b>Attitudes towards further surgery</b>                 |                        |               |         |
| Would you have the surgery again (yes)                   | 3688 (92%)             | 223 (36%)     | < 0.001 |
| Would you recommend the operation to another (yes)       | 3936 (97%)             | 292 (48%)     | < 0.001 |
| <b>Patient Reported Outcome Questionnaires</b>           |                        |               |         |
| <b>Pre-operative</b>                                     |                        |               |         |
| SF-12 PCS, median (IQR)                                  | 28.6 (9.4)             | 27.2 (8.1)    | 0.001   |
| SF -12 MCS, median (IQR)                                 | 50.9 (19.2)            | 43.8 (20.3)   | < 0.001 |
| Oxford Score, median (IQR)                               | 19.0 (12.0)            | 15.9 (10.0)   | < 0.001 |
| <b>6 months</b>                                          |                        |               |         |
| SF-12 PCS, median (IQR)                                  | 41.6 (16.7)            | 30.4 (9.3)    | < 0.001 |
| SF -12 MCS, median (IQR)                                 | 56.5 (12.6)            | 43.2 (19.2)   | < 0.001 |
| Oxford Score, median (IQR)                               | 39.0 (12.0)            | 24.0 (14.0)   | < 0.001 |
| <b>12 months</b>                                         |                        |               |         |
| SF-12 PCS, median (IQR)                                  | 44.1 (8.7)             | 29.4 (8.7)    | < 0.001 |
| SF -12 MCS, median (IQR)                                 | 56.2 (12.7)            | 41.7 (16.9)   | < 0.001 |
| Oxford Score, median (IQR)                               | 41.0 (11.0)            | 23.0 (12.0)   | < 0.001 |

Highly significant correlations of modest-strong strength were found between overall satisfaction and the satisfaction with the specific aspects of surgical outcome (Table 2). Highly significant correlations of modest-strong strength were also apparent between overall satisfaction and the attitudes towards further surgery; 'Would you have the surgery again' ( $r = 0.59$ ,  $p = <0.001$ ) and 'Would you recommend the operation to another' ( $r = 0.63$ ,  $p = <0.001$ ).



**Table 2: correlations between overall satisfaction response and satisfaction with individual facets of surgical outcome**

| Correlation with overall satisfaction   | <i>rho</i> | Sig.   |
|-----------------------------------------|------------|--------|
| meeting of expectations                 | 0.74       | <0.001 |
| pain relief in affected joint           | 0.72       | <0.001 |
| ability to perform activities           | 0.65       | <0.001 |
| ability to perform heavy work or sports | 0.43       | <0.001 |
| rating of hospital experience           | 0.43       | <0.001 |

All 21 variables were entered into a stepwise binary regression model. 5 variables were predictive of overall satisfaction with outcome; (1) Meeting pre-operative expectations, (2) satisfaction with pain relief, (3) satisfaction with the overall hospital experience, (4) pre-operative and (5) one year Oxford Scores (Table 3). There was no statistically significant difference between the observed probabilities and those predicted by the model (Hosmer-Lemeshow goodness-of-fit test,  $\chi^2 = 5.704$ ,  $p = 0.680$ ). Thus the model could be considered as a good fit. Overall, the model was able to correctly predict 97% of those who were satisfied. A change of 1 category (on the 0-6 category scale) of meeting expectations or satisfaction with pain relief resulted in being 2-3 times more likely to be satisfied with outcome.

**Table 3: Significant predictors of being satisfied with outcome**

| Variable                                  | Sig.  | Odds ratio | CI            |
|-------------------------------------------|-------|------------|---------------|
| having expectations met                   | <.001 | 2.88       | 2.475 – 3.343 |
| satisfaction with pain relief             | <.001 | 2.68       | 2.258 – 3.174 |
| satisfaction with the hospital experience | <.001 | 1.35       | 1.170 – 1.559 |
| one-year Oxford Score                     | <.001 | 1.07       | 1.047 – 1.095 |
| pre-op Oxford Score                       | <.001 | 0.96       | 0.933 – 0.978 |

## DISCUSSION

We have shown that patient satisfaction following total joint arthroplasty is primarily based on three facets; meeting pre-operative expectations of surgery, achieving satisfactory pain relief following

1  
2  
3 surgery and the overall hospital experience. These three factors drove a model which was able to  
4 explain 97% of the variation in the patient's overall satisfaction response. It is important to note that  
5 various factors previously reported to influence clinical outcome (as measured by PROM scores);  
6 such as patient age, gender, co-morbidities, length of post-operative stay, mental health (SF12 MCS),  
7 general physical health (SF12 PCS) and whether the hip or knee joint was replaced did not help  
8 explain variation in overall patient satisfaction.  
9  
10  
11  
12

13  
14 Despite national efforts of categorisation, using patient reported assessment tools, patient outcome  
15 following joint arthroplasty remains poorly understood and a highly complex construct to measure.  
16 Indeed Carr et al<sup>12</sup> speculate that it is highly unlikely a single universal instrument that is valid for all  
17 aspects and domains of outcome will ever be developed. Current patient report instruments do not  
18 account for satisfaction, though this is possibly the most important metric of patient outcome, and  
19 drives political discussions as to the relative benefits of procedures.  
20  
21  
22  
23

24 Satisfaction as a concept has its origins in marketing and can be defined as "an attitude like  
25 judgement following an act, which is based on a series of product-consumer interactions"<sup>13</sup>. It has  
26 previously been used as a performance indicator in a health context for cancer care in the USA<sup>14</sup>, and  
27 is known broadly to relate to outcome scores<sup>3, 15</sup>, though this relationship is not well established.  
28  
29  
30

31 Patient outcome scores and patient satisfaction, though associated, are not the same metric.  
32 Recently Judge et al<sup>4, 16</sup> have assessed the relevant change in Oxford Score that corresponds to  
33 satisfaction with surgery using receiver operating characteristic (ROC) curve analysis. A threshold of  
34 38 points at 12 months and 11 point change in Oxford Hip Score or 14 point change in Oxford Knee  
35 Score (from pre-operative score) is suggested as being predictive of satisfaction<sup>4, 16</sup>. The thresholds  
36 presented however vary with the pre-operative score. Judge et al<sup>16</sup> also show how the widespread  
37 attempts to use PROMs data to prioritise patients for arthroplasty surgery is ineffective,  
38 demonstrating that pre-operative Oxford Scores in isolation have no predictive accuracy in deriving  
39 post-operative satisfaction. In the analysis presented here, both pre-operative and one year Oxford  
40 Scores contributed to the final regression model, reflecting the patient's change in outcome score,  
41 though neither carried a large influence with odds ratios of close to 1.  
42  
43  
44  
45  
46  
47  
48  
49

50 Mental health<sup>17</sup> has been suggested to influence outcome (as measured by PROMS), and though our  
51 data highlights that dissatisfied patients generally reported worse mental health scores, it was not a  
52 predictor of overall satisfaction in multivariate modelling controlling for confounding. Neither were  
53 differences in satisfaction between patients undergoing THA and those undergoing TKA surgery  
54 relevant to the final model.  
55  
56  
57  
58  
59  
60

1  
2  
3 Baker et al<sup>2</sup> suggest that failure to meet optimistic expectations is associated with dissatisfaction,  
4 and the fulfilment of expectation has been correlated to satisfaction with outcome<sup>8</sup>. Mannion et al<sup>18</sup>  
5 however suggest that actual status (pain and function) of the individual may be more predictive of  
6 satisfaction than expectations of outcome using multivariate techniques. We suggest that the  
7 meeting pre-operative expectations is an equally important factor as achieving satisfactory pain  
8 relief post-operatively, with each factor demonstrating an odds ratio of around 3 points. Perhaps  
9 most interesting is the inclusion of the rating of overall hospital experience as the only other factor  
10 in the model. This aspect has not been well investigated previously and reflects the important role of  
11 the patient's experience of their interaction with hospital services as to their final satisfaction with  
12 the service provided.  
13  
14  
15  
16  
17  
18  
19

20 PROM scores are useful tools for the assessment of clinical outcome, in which they focus primarily  
21 on pain relief<sup>19, 20</sup>. This analysis highlights that while pain relief is very relevant to patient  
22 satisfaction, it is not the sole driver; the meeting of expectations demonstrated the same influence,  
23 while the patient's 'hospital experience' of care was also significant. Satisfaction is clearly an  
24 important concept; in a healthcare environment it reflects the patient's perception of success. Three  
25 components to healthcare satisfaction have been suggested previously; structure, process and  
26 outcome<sup>21</sup>. Three similar 'quality domains' have also been described – safety, outcomes, and the  
27 patient experience<sup>22</sup>. Our findings quantify these broad concepts for joint replacement.  
28  
29  
30  
31  
32  
33  
34  
35  
36

### 37 **Strengths and Limitations**

38 This study includes a large patient cohort from a single NHS orthopaedic centre with multiple  
39 surgeons. Valid and reliable instruments for assessing change in health status and outcome of joint  
40 arthroplasty have been used, and data has been collected prospectively with a good rate of follow-  
41 up. The level of satisfaction we report is strikingly similar to that recorded in the 2005 national joint  
42 registry postal survey<sup>5</sup> (90% satisfaction with hip replacement and 82% satisfaction with knee  
43 replacement). As we have pre-operative data we were able to model how the change in pain and  
44 function related to satisfaction. This is important, as it is likely that satisfaction depends not on the  
45 post-operative status, but on the change in status<sup>2</sup>. As most patients report high satisfaction with  
46 joint arthroplasty there is some doubt as to how discriminating this measure is, and caution has  
47 been advised in the use of a standardised instrument for the measurement of satisfaction<sup>23</sup>. It is  
48 recommended that satisfaction questions should be context and objective specific rather than  
49 generic. Although the additional questions we asked were not formally validated as a measure of  
50  
51  
52  
53  
54  
55  
56  
57  
58  
59  
60

1  
2  
3 satisfaction, they were directed explicitly at aspects relating to joint arthroplasty allowing a more in-  
4 depth analysis of the individual factors that contribute to overall satisfaction. Satisfaction is what the  
5 public perceive as the eventual outcome. It is significantly influenced by clinical outcome (pain relief,  
6 and the avoidance of complications). However it is also significantly influenced by the pathway to  
7 care and the hospital experience. The relative proportions to which these factors contribute  
8 towards overall satisfaction are likely to differ by condition or treatment depending on the success  
9 of treatment for different conditions.  
10  
11  
12  
13

14  
15  
16  
17 Recently there has been a focus on quality in the NHS (improving clinical outcomes and reducing  
18 complications) which has been highly successful. Significant reductions in hospital acquired  
19 infections, waiting times and specific procedure related problems such as dislocation following hip  
20 replacement are all reported, yet patient satisfaction with outcome has remained constant over this  
21 timeframe<sup>2-6</sup>, and overall satisfaction with the NHS recently declined<sup>24</sup>. In marketing, it is considered  
22 that focussing on service quality alone, without appreciating how it is delivered, is misguided; failure  
23 to appreciate the critical role that interfacing departments play in customer satisfaction is setting  
24 the stage for '*lower customer retention*'<sup>25</sup>. This is equally true when applied to healthcare  
25 environment, indeed Baker et al<sup>26</sup> note that better performance (in delivering joint replacement  
26 outcomes) may bring the reward of more customers as patients and commissioners seek out high  
27 performers for their elective procedures. We suggest that the national reduction in satisfaction may  
28 in part be due to fragmented pathways of care to surgery and a concentration on administering time  
29 targets rather than managing patient care in its wider context within a general NHS facility.  
30  
31  
32  
33  
34  
35  
36  
37  
38  
39  
40  
41

42 In conclusion, overall patient satisfaction following joint arthroplasty is significantly affected by  
43 fulfilment of pre-surgical expectations, symptomatic pain relief achieved following surgery and the  
44 hospital experience. The Oxford Scores contributed a minimal additional influence in a model which  
45 explained 97% of the variation in overall satisfaction response. Focussing on administration of  
46 waiting lists as opposed to managing the patient's experience may be influencing the observed  
47 reduction of satisfaction with healthcare delivery. This is particularly evident for joint replacement in  
48 NHS facilities, where emergency admissions often de-prioritise "elective" surgeries leading to  
49 measurable differences in satisfaction between units focussed on the patient pathway for one  
50 condition or treatment and those providing the generality of care where focus has been blurred and  
51 priority is given to emergency services.  
52  
53  
54  
55  
56  
57  
58  
59  
60

### Executive licence

“The Corresponding Author has the right to grant on behalf of all authors and does grant on behalf of all authors, [a worldwide licence](#) to the Publishers and its licensees in perpetuity, in all forms, formats and media (whether known now or created in the future), to i) publish, reproduce, distribute, display and store the Contribution, ii) translate the Contribution into other languages, create adaptations, reprints, include within collections and create summaries, extracts and/or, abstracts of the Contribution, iii) create any other derivative work(s) based on the Contribution, iv) to exploit all subsidiary rights in the Contribution, v) the inclusion of electronic links from the Contribution to third party material where-ever it may be located; and, vi) licence any third party to do any or all of the above.”

### Funding

No specific funding was received in relation to this study.

### Declaration of competing interests

“All authors have completed the Unified Competing Interest form at [www.icmje.org/coi\\_disclosure.pdf](http://www.icmje.org/coi_disclosure.pdf) (available on request from the corresponding author) and declare: no support from any organisation for the submitted work; The arthroplasty database is supported by an educational grant to the University of Edinburgh (AHRW Simpson) by Stryker Orthopaedics, P Gaston has previously worked as a consultant for Stryker Orthopaedics, CR Howie is the president elect of the British Orthopaedic Association. The authors declare no additional potential conflict of interest with the submitted work. ”

### Contributorship statement

DFH, JL and CRH conceived the study, all authors were involved in the study design, DM collated the data, JL performed the analysis, DFH and JL were primarily responsible for interpretation of data, DFH drafted the article, all authors revised it critically for important intellectual content and all approved the final text. CRH is the guarantor.

### Data Sharing

The dataset is available via the corresponding author though is subject to approval of the data manager due to NHS restrictions in place to protect patient confidentiality.

### REFERENCES

<sup>1</sup>Appleby JA, Lee L. 2012. Health care in Britain: Is there a problem and what needs to change? In: Park, A., Clery, E., Curtice, J., Phillips, M. and Utting, D. (eds.) *British Social Attitudes: the 29th Report* [online] London: NatCen Social Research. Available from <http://www.bsa-29.natcen.ac.uk>.

1  
2  
3 <sup>2</sup>Baker PN, van der Meulen JH, Lewsey J, et al. The role of pain and function in determining patient satisfaction  
4 after total knee replacement. *J Bone Joint Surg Br* 2007;89(7):893-900.

5  
6  
7 <sup>3</sup>Hamilton D, Henderson GR, Gaston P, et al. Comparative outcomes of total hip and knee arthroplasty: a  
8 prospective cohort study. *Postgrad Med J*. 2012;88(1045):627-31

9  
10  
11 <sup>4</sup>Judge A, Arden NK, Kiran A, et al. Interpretation of patient-reported outcomes for hip and knee replacement  
12 surgery: identification of thresholds associated with satisfaction with surgery. *J Bone Joint Surg Br*.  
13 2012;94(3):412-8.

14  
15  
16 <sup>5</sup>National Joint Registry. 2<sup>nd</sup> Annual Report. Hemmel Hempstead, UK: National Joint registry for England and  
17 Wales, 2005, <http://www.njrcentre.org.uk> (20<sup>th</sup> October last accessed)

18  
19  
20 <sup>6</sup>Robertsson O, Dunbar M, Pehrsson T, et al. Patient satisfaction after knee arthroplasty. *Acta Orthop Scand*  
21 2000;71(3):262-67.

22  
23  
24 <sup>7</sup>Heck D, Robinson RL, Partridge CM, et al. Patient outcomes after knee replacement. *Clin Orthop Relat Res*  
25 1998;356:93-110.

26  
27  
28 <sup>8</sup>Scott CEH, Bugler KE, Clement ND, et al. Patient expectations of arthroplasty of the hip and knee. *J Bone Joint*  
29 *Surg [Br]* 2012;94: 974-981

30  
31  
32 <sup>9</sup>Dawson J, Fitzpatrick R, Carr A, et al. Questionnaire on the perceptions of patients about total hip  
33 replacement. *J Bone Joint Surg Br* 1996;78-B:185-90.

34  
35  
36 <sup>10</sup>Dawson J, Fitzpatrick R, Murray, D, et al. Questionnaire on the perceptions of patients about total knee  
37 replacement. *J Bone Joint Surg Br* 1998;80-B(1):61-9.

38  
39  
40 <sup>11</sup>Ware JE and Sherbourne CD. The MOS 36-item Short-form Health Survey (SF-36). *Med Care* 1992;30(6):473-  
41 83.

42  
43  
44 <sup>12</sup>Carr AJ, Robertsson O, Graves S, et al. Knee replacement. *Lancet*. 2012;379(9823):1331-40. Epub 2012 Mar 6.  
45 Review.

46  
47 <sup>13</sup>Fournire S and Mick DG. 1999, Rediscovering satisfaction *Journal of Marketing* 63(4) 5-19).

48  
49 <sup>14</sup>Tisnado DM et al. Financial incentives for quality in breast cancer care. *Am J Manag Care* 14(7) 457-466).

50  
51 <sup>15</sup>Anderson JG, Wixson RI, Tsai D, et al. Functional outcome and patient satisfaction in total knee pateints over  
52 the age of 75. *J. Arthroplasty* 1996;11:831-40

53  
54  
55 <sup>16</sup>Judge A, Arden NK, Price A, et al. Assessing patients for joint replacement: can pre-operative Oxford hip and  
56 knee scores be used to predict patient satisfaction following joint replacement surgery and to guide patient  
57 selection? *J Bone Joint Surg Br*. 2011;93(12):1660-4

- 1  
2  
3  
4  
5  
6  
7  
8  
9  
10  
11  
12  
13  
14  
15  
16  
17  
18  
19  
20  
21  
22  
23  
24  
25  
26  
27  
28  
29  
30  
31  
32  
33  
34  
35  
36  
37  
38  
39  
40  
41  
42  
43  
44  
45  
46  
47  
48  
49  
50  
51  
52  
53  
54  
55  
56  
57  
58  
59  
60
- <sup>17</sup>Brander VA, Gondek S, Martin E, Stulberg SD. Pain and depression influence outcome 5 years after knee replacement surgery. *Clin Orthop Relat Res* 2007;464:21-6.
- <sup>18</sup>Mannion AF, Kämpfen S, Munzinger U, et al. The role of patient expectations in predicting outcome after total knee arthroplasty. *Arthritis Res Ther.* 2009;11(5):R139. Epub 2009 Sep 21.
- <sup>19</sup>Hamilton DF, Gaston P, Simpson AHRW. Is patient reporting of physical function accurate following total knee arthroplasty? *J Bone Joint Surg Br* 2012;11:1506-1510
- <sup>20</sup>Terwee CB, van der Slikke RMA, Van Lummel R, et al. Self-reported physical functioning was more influenced by pain than performance-based physical functioning in knee-osteoarthritis patients. *J Clin Epidemiol* 2006;59:724-31.
- <sup>21</sup>Cleary PD, Mcneill BJ. Patient satisfaction as an indicator of quality care. *Inquiry* 1988 25(1) 25-36.
- <sup>22</sup>Frampton L (ed) Exploring the quality challenges. *The clinical services journal* 2012;11(3) 22-25
- <sup>23</sup>Carr-Hill, R. A. The measurement of patient satisfaction. *Journal of Public Health Medicine* 1992;14(3):236-49.
- <sup>24</sup>Torjesen I. 2012. Patient satisfaction with NHS fell by 12% in 2011. *BMJ (Clinical Research Ed)* vol 344 ppe4091.
- <sup>25</sup>Durvasula S, Lysonski S, Mehta S. Service encounters: the missing link between service quality perceptions and satisfaction. *J Applied business research* 2005;21(3):15-26
- <sup>26</sup>Baker PN, Deehan DJ, Lees D, et al. The effect of surgical factors on early patient-reported outcome measures (PROMS) following total knee replacement. *J Bone Joint Surg Br.* 2012;94(8):1058-66

STROBE 2007 (v4) Statement—Checklist of items that should be included in reports of cohort studies

| Section/Topic             | Item # | Recommendation                                                                                                                                                                       | Reported on page # |
|---------------------------|--------|--------------------------------------------------------------------------------------------------------------------------------------------------------------------------------------|--------------------|
| Title and abstract        | 1      | (a) Indicate the study’s design with a commonly used term in the title or the abstract                                                                                               | 2,3                |
|                           |        | (b) Provide in the abstract an informative and balanced summary of what was done and what was found                                                                                  | 3                  |
| <b>Introduction</b>       |        |                                                                                                                                                                                      |                    |
| Background/rationale      | 2      | Explain the scientific background and rationale for the investigation being reported                                                                                                 | 4                  |
| Objectives                | 3      | State specific objectives, including any prespecified hypotheses                                                                                                                     | 4                  |
| <b>Methods</b>            |        |                                                                                                                                                                                      |                    |
| Study design              | 4      | Present key elements of study design early in the paper                                                                                                                              | 4,5                |
| Setting                   | 5      | Describe the setting, locations, and relevant dates, including periods of recruitment, exposure, follow-up, and data collection                                                      | 4,5                |
| Participants              | 6      | (a) Give the eligibility criteria, and the sources and methods of selection of participants. Describe methods of follow-up                                                           | 4,5                |
|                           |        | (b) For matched studies, give matching criteria and number of exposed and unexposed                                                                                                  |                    |
| Variables                 | 7      | Clearly define all outcomes, exposures, predictors, potential confounders, and effect modifiers. Give diagnostic criteria, if applicable                                             | 4,5                |
| Data sources/ measurement | 8*     | For each variable of interest, give sources of data and details of methods of assessment (measurement). Describe comparability of assessment methods if there is more than one group | 4,5                |
| Bias                      | 9      | Describe any efforts to address potential sources of bias                                                                                                                            | 4,5                |
| Study size                | 10     | Explain how the study size was arrived at                                                                                                                                            | 4,5                |
| Quantitative variables    | 11     | Explain how quantitative variables were handled in the analyses. If applicable, describe which groupings were chosen and why                                                         | 5                  |
| Statistical methods       | 12     | (a) Describe all statistical methods, including those used to control for confounding                                                                                                | 5,6                |
|                           |        | (b) Describe any methods used to examine subgroups and interactions                                                                                                                  |                    |
|                           |        | (c) Explain how missing data were addressed                                                                                                                                          | 5                  |
|                           |        | (d) If applicable, explain how loss to follow-up was addressed                                                                                                                       | 5                  |
|                           |        | (e) Describe any sensitivity analyses                                                                                                                                                |                    |
| <b>Results</b>            |        |                                                                                                                                                                                      |                    |



|                          |     |                                                                                                                                                                                                                                                                                                                                                                                                               |         |
|--------------------------|-----|---------------------------------------------------------------------------------------------------------------------------------------------------------------------------------------------------------------------------------------------------------------------------------------------------------------------------------------------------------------------------------------------------------------|---------|
| Participants             | 13* | (a) Report numbers of individuals at each stage of study—eg numbers potentially eligible, examined for eligibility, confirmed eligible, included in the study, completing follow-up, and analysed<br>(b) Give reasons for non-participation at each stage<br>(c) Consider use of a flow diagram                                                                                                               | 5       |
| Descriptive data         | 14* | (a) Give characteristics of study participants (eg demographic, clinical, social) and information on exposures and potential confounders<br>(b) Indicate number of participants with missing data for each variable of interest<br>(c) Summarise follow-up time (eg, average and total amount)                                                                                                                | 6,7     |
| Outcome data             | 15* | Report numbers of outcome events or summary measures over time                                                                                                                                                                                                                                                                                                                                                | 6       |
| Main results             | 16  | (a) Give unadjusted estimates and, if applicable, confounder-adjusted estimates and their precision (eg, 95% confidence interval). Make clear which confounders were adjusted for and why they were included<br>(b) Report category boundaries when continuous variables were categorized<br>(c) If relevant, consider translating estimates of relative risk into absolute risk for a meaningful time period | 6,7,8   |
| Other analyses           | 17  | Report other analyses done—eg analyses of subgroups and interactions, and sensitivity analyses                                                                                                                                                                                                                                                                                                                |         |
| <b>Discussion</b>        |     |                                                                                                                                                                                                                                                                                                                                                                                                               |         |
| Key results              | 18  | Summarise key results with reference to study objectives                                                                                                                                                                                                                                                                                                                                                      | 9       |
| <b>Limitations</b>       |     |                                                                                                                                                                                                                                                                                                                                                                                                               |         |
| Interpretation           | 20  | Give a cautious overall interpretation of results considering objectives, limitations, multiplicity of analyses, results from similar studies, and other relevant evidence                                                                                                                                                                                                                                    | 9,10,11 |
| Generalisability         | 21  | Discuss the generalisability (external validity) of the study results                                                                                                                                                                                                                                                                                                                                         | 9,10,11 |
| <b>Other information</b> |     |                                                                                                                                                                                                                                                                                                                                                                                                               |         |
| Funding                  | 22  | Give the source of funding and the role of the funders for the present study and, if applicable, for the original study on which the present article is based                                                                                                                                                                                                                                                 | 12      |

\*Give information separately for cases and controls in case-control studies and, if applicable, for exposed and unexposed groups in cohort and cross-sectional studies.

**Note:** An Explanation and Elaboration article discusses each checklist item and gives methodological background and published examples of transparent reporting. The STROBE checklist is best used in conjunction with this article (freely available on the Web sites of PLoS Medicine at <http://www.plosmedicine.org/>, Annals of Internal Medicine at <http://www.annals.org/>, and Epidemiology at <http://www.epidem.com/>). Information on the STROBE Initiative is available at [www.strobe-statement.org](http://www.strobe-statement.org).



**What determines patient satisfaction with surgery? A  
PROSPECTIVE COHORT STUDY OF 4709 PATIENTS  
FOLLOWING TOTAL JOINT REPLACEMENT**

|                                    |                                                                                                                                                                                                                                                                                                                                                                                                                                        |
|------------------------------------|----------------------------------------------------------------------------------------------------------------------------------------------------------------------------------------------------------------------------------------------------------------------------------------------------------------------------------------------------------------------------------------------------------------------------------------|
| Journal:                           | <i>BMJ Open</i>                                                                                                                                                                                                                                                                                                                                                                                                                        |
| Manuscript ID:                     | bmjopen-2012-002525.R1                                                                                                                                                                                                                                                                                                                                                                                                                 |
| Article Type:                      | Research                                                                                                                                                                                                                                                                                                                                                                                                                               |
| Date Submitted by the Author:      | 12-Feb-2013                                                                                                                                                                                                                                                                                                                                                                                                                            |
| Complete List of Authors:          | Hamilton, David; University of Edinburgh, Orthopaedics<br>Lane, Judith; Queen Margaret University, Physiotherapy<br>Gaston, Paul; NHS Lothian, Orthopaedics and Trauma<br>Patton, James; NHS Lothian, Orthopaedics and Trauma<br>MacDonald, Deborah; University of Edinburgh, Department of Orthopaedics<br>Simpson, Hamish; University of Edinburgh, Department of Orthopaedics<br>Howie, Colin; NHS Lothian, Orthopaedics and Trauma |
| <b>Primary Subject<br>Heading</b>: | Surgery                                                                                                                                                                                                                                                                                                                                                                                                                                |
| Secondary Subject Heading:         | Health policy                                                                                                                                                                                                                                                                                                                                                                                                                          |
| Keywords:                          | SURGERY, ORTHOPAEDIC & TRAUMA SURGERY, Limb reconstruction <<br>ORTHOPAEDIC & TRAUMA SURGERY, Hip < ORTHOPAEDIC & TRAUMA<br>SURGERY, Knee < ORTHOPAEDIC & TRAUMA SURGERY                                                                                                                                                                                                                                                               |
|                                    |                                                                                                                                                                                                                                                                                                                                                                                                                                        |

SCHOLARONE™  
Manuscripts

Only

**What determines patient satisfaction with surgery?**

A PROSPECTIVE COHORT STUDY OF 4709 PATIENTS FOLLOWING TOTAL JOINT REPLACEMENT

Hamilton DF, Lane JV, Gaston P, Patton JT, MacDonald D, Simpson AHRW, Howie CR

Department of Orthopaedics, University of Edinburgh, Edinburgh, EH164SB, UK  
DF Hamilton, Research Fellow; D MacDonald, Research Co-ordinator; AHRW Simpson, Professor of  
Orthopaedics and Trauma

Department of Physiotherapy, Queen Margaret University, Edinburgh, EH21 6UU, UK  
JV Lane, Lecturer

Royal Infirmary of Edinburgh, Little France Crescent, Edinburgh, EH16 4SA, UK  
CR Howie, Consultant Orthopaedic Surgeon; P Gaston, Consultant Orthopaedic Surgeon; JT Patton, Consultant  
Orthopaedic Surgeon

Correspondence to: [d.f.hamilton@ed.ac.uk](mailto:d.f.hamilton@ed.ac.uk)

## Article Summary;

### Article focus

Patient satisfaction rates have been quoted following surgical intervention; and these used to assess the success of interventions.

Clinical care and patient outcomes have improved over recent years, however satisfaction with surgical services has remained constant over this timeframe.

Many factors have been suggested to influence patient satisfaction; however there is little consensus as to which areas of care actually influence overall satisfaction response.

### Key messages

Our study identifies 5 factors that explain 97% of the variation in the patient's overall satisfaction following lower limb joint arthroplasty; (1) meeting of pre-operative expectations, (2) the achievement of satisfactory pain relief, (3) the patient's subjective hospital experience, and to a lesser extent (4) pre-operative physical status (Oxford Score) and (5) 12 month physical status (Oxford Score).

Factors that influence clinical outcome scores (PROMS) such as age, gender and co-morbidities do not impact upon satisfaction.

Clinical teams currently aim to manage pre-operative expectations and post-operative pain relief. Management of the patient's hospital experience may then be a key factor in optimizing overall patient satisfaction, which has implications for service delivery.

### Strengths and Limitations

This study benefits from a large prospective patient cohort at a single NHS orthopaedic centre with multiple surgeons.

As most patients report high satisfaction with joint arthroplasty there is some doubt as to how discriminating this measure is, and caution has been advised in the use of a standardised instrument for the measurement of satisfaction.

The wider generalisability of these results from joint arthroplasty to other surgical procedures is assumed but unconfirmed

**ABSTRACT**

**Objectives:** To investigate the factors which influence patient satisfaction with surgical services and to explore the relationship between overall satisfaction, satisfaction with specific facets of outcome and measured clinical outcomes (Patient Reported Outcome Measures).

**Design:** Prospective cohort study

**Setting:** Single NHS teaching hospital

**Participants:** 4709 individuals undergoing primary lower limb joint replacement over a four year period (Jan 2006 – Dec 2010)

**Main Outcome Measures:** Overall patient satisfaction, clinical outcomes as measured by PROMS (Oxford Hip or Knee Score, SF-12), satisfaction with 5 specific aspects of surgical outcome, attitudes towards further surgery, length of hospital stay.

**Results:** Overall patient satisfaction was predicted by; (1) meeting pre-operative expectations [Odds Ratio 2.62 (95% CI, 2.24-3.07)], (2) satisfaction with pain relief [2.40 (2.00 -2.87)], (3) satisfaction with the hospital experience [1.7 (1.45-1.91)], (4) 12 month [1.08 (1.05-1.10)] and (5) pre-operative [0.95 (0.93-0.97)] Oxford Scores. These 5 factors contributed to a model able to correctly predict 97% of the variation in overall patient satisfaction response. The factors having greatest effect were the degree to which patient expectations were met and satisfaction with pain relief; the Oxford Scores carried little weight in the algorithm. Various factors previously reported to influence clinical outcomes such as age, gender, co-morbidities, length of post-operative hospital stay did not help explain variation in overall patient satisfaction.

**Conclusions:** Three factors broadly determine the patient's overall satisfaction following lower limb joint arthroplasty; meeting pre-operative expectations, achieving satisfactory pain relief, and a satisfactory hospital experience. Pain relief and expectations are managed by clinical teams; however a fractured access to surgical services impacts on the patient's hospital experience which may reduce overall satisfaction. In the absence of complications, how we deliver healthcare may be of key importance along with the specifics of what we deliver, which has clear implications for units providing surgical services.

1  
2  
3 Satisfaction with NHS surgical services has recently declined<sup>1</sup> despite more rapid access to, and  
4 fewer measurable complications from surgical care. There are few procedures or treatments where  
5 the monitoring of outcomes and satisfaction has been consistent enough to investigate this  
6 apparent paradox. Joint replacement is an example of a high volume service that has been closely  
7 monitored over recent years.  
8  
9  
10

11 Traditionally, clinical success has been measured by lack of complications or by specific clinical  
12 parameters, e.g. range of motion or blood pressure control. More recently, clinical outcomes have  
13 been assessed by patient reported outcome measures (PROMS). Patient satisfaction is perhaps the  
14 most important criterion of success. This is well recognised in the service industries, though remains  
15 something of a nebulous concept in clinical care. Despite the extensive literature on clinical  
16 outcomes following joint arthroplasty, comparatively few studies address patient satisfaction<sup>2</sup>.  
17 Where this is reported, the majority of patients are described as being satisfied with surgical  
18 outcome; though consistent reports of 10-20% dissatisfaction with joint arthroplasty persist<sup>2-6</sup>. A  
19 number of authors have suggested various factors that may influence satisfaction with arthroplasty,  
20 such as post-operative pain or joint stiffness, though our current understanding as to why some  
21 patients are satisfied and others are not remains limited<sup>6-8</sup>. Indeed some patients reporting a bad  
22 clinical outcome, in terms of pain and function, may report good levels of satisfaction with their  
23 surgical outcome and vice versa<sup>2</sup>. In the wider surgical literature various factors such as meeting of  
24 expectations, staff politeness, the surgeon's communication skills and surgical waiting times have all  
25 been suggested as influencing eventual satisfaction<sup>9-11</sup> though again consensus is elusive. Clearly  
26 overall satisfaction is a broad concept that encompasses more than simply the clinical outcome.  
27  
28  
29  
30  
31  
32  
33  
34  
35  
36  
37

38 Our aim was to explore the relationship between patient's level of overall satisfaction with their hip  
39 or knee replacement, satisfaction with specific facets of outcome and measured clinical outcomes  
40 (Patient Reported Outcome Measures).  
41  
42  
43  
44  
45

## 46 **METHODS**

47  
48 During a four year period (January 2006 to December 2010) all patients undergoing lower limb joint  
49 replacement at a single hospital were entered into a prospectively collected arthroplasty database,  
50 for which regional ethical approval had been obtained (11/AL/0079). The study questionnaire was  
51 completed by 4709 (95%) patients. This comprised 2462 patients receiving total hip replacement and  
52 2247 receiving total knee replacement. All data were included in the analysis.  
53  
54  
55  
56  
57  
58  
59  
60

1  
2  
3 All patients completed pre-operative PROM questionnaires, Oxford Hip or Knee Score<sup>12, 13</sup> and  
4 Medical Outcomes Study Short Form 12 (SF-12) health assessment<sup>14</sup>, and were sent postal follow-up  
5 questionnaires at 6 and 12 months post-operation to assess outcome and satisfaction. Procedures  
6 were carried out by multiple consultant orthopaedic surgeons and their supervised trainees. All data  
7 was collected independently from the clinical team by the arthroplasty outcomes research unit of  
8 the University of Edinburgh and NHS Lothian.  
9

10  
11  
12 The Oxford Scores consist of 12 questions relating to the patients perceived pain and functional  
13 ability, answered on a Likert scale with values from 0 to 4. The score ranges from 0-48, with overall  
14 score calculated from the responses to the 12 questions. A score of 0 is the worst possible outcome  
15 suggesting severe symptoms and dysfunction, while 48 is the best possible outcome. The SF-12  
16 results in two scores, the physical and mental component summary (PCS and MCS) scores. This score  
17 is calculated using norm-based methodology and population mean scores. Both PCS and MCS have a  
18 population mean score of 50 with standard deviation of 10.  
19

20  
21 Pre-operative information was collected as to the patient's age, gender and presence of co-  
22 morbidities. Post-operative length of stay was recorded upon discharge. At 12 months patients were  
23 also asked to rate their overall satisfaction with their operated hip or knee on a 4 point scale (very  
24 satisfied, satisfied, unsure or dissatisfied). Data on satisfaction with 5 specific facets of surgical  
25 outcome were obtained with the following questions, answered on a 6 point scale (excellently, very  
26 well, well, fairly, poorly, don't know); (1) "how well did the surgery relieve the pain in your affected  
27 joint?" (2) "How well did the surgery increase your ability to perform regular activities?" (3) "How  
28 well did the surgery allow you to perform heavy work or sport activities?" (4) "How well did the  
29 surgery meet your expectations?" We then asked our patients to indicate their satisfaction with the  
30 care they received at the hospital with the question (5) "rate your overall hospital experience" using  
31 the response scale; excellent, very good, good, fair, poor or unknown. We also asked a further 2  
32 questions that enquired as to the patient's attitude towards further surgery; (1) "would you have  
33 this operation again if it were required on another joint?" and (2) "would you recommend this  
34 operation to someone else?" (Possible responses: Definitely yes, possibly yes, probably not, certainly  
35 not or not sure). These were included to mimic the modelling done in marketing research, where  
36 return visits are considered a successful outcome.  
37  
38  
39  
40  
41  
42  
43  
44  
45  
46  
47  
48  
49  
50  
51

### 52 **Statistical analysis**

53  
54  
55 Data were assessed with SPSS version 17 (IBM). Data were not normally distributed and therefore  
56 variables have been presented as median and inter-quartile ranges. The satisfaction score at 1 year  
57  
58  
59  
60

1  
2  
3 was simplified into a binary variable of whether or not the patient was satisfied with the surgery.  
4 Those who reported 'satisfied' or 'very satisfied' were categorised as satisfied. Those who were  
5 either 'unsure' or 'not satisfied' were categorised as 'not satisfied'. 86.6% of patients were either  
6 very satisfied or satisfied, and 13.4% were unsure or not satisfied. Bivariate analysis was undertaken  
7 to determine whether differences in outcome were associated by satisfaction status. Logistic  
8 regression analysis was then performed to determine the variables associated with satisfaction at  
9 one year. Multivariate modelling, using a stepwise binary building technique, was employed with  
10 predictive variables selected if their bivariate significance was  $p = 0.1$  to accommodate the possibility  
11 of variable achieving statistical significance once the confounding effect of another variable was  
12 controlled.  
13  
14  
15  
16  
17  
18  
19  
20  
21

## 22 RESULTS

23  
24 Demographic details are described in table 1, split dichotomously into satisfied or unsatisfied patient  
25 groups. Age and gender were not associated with differences in satisfaction, however a significantly  
26 higher proportion of the THA group were satisfied than the TKA group (Table 1,  $\chi^2 = 49.85$ ,  $p <$   
27  $0.001$ ). The median number of co-morbidities (2) was the same though is reported as being  
28 statistically different between groups; as the Mann-Whitney test does not actually compare the  
29 medians but looks at the ranking of all of the data, which allows for this apparent contradiction.  
30 Median length of stay differed by a single day between those who were satisfied and those who  
31 were not, which was statistically significant. All patient reported outcome scores (including pre-  
32 operative scores) were significantly better in the satisfied group. Satisfaction with the specific  
33 aspects of surgical outcome, the hospital experience and the attitude towards further surgery were  
34 all significantly greater ( $p = 0.001$ ) in those who reported overall satisfaction with outcome.  
35  
36  
37  
38  
39  
40  
41  
42  
43  
44  
45  
46  
47  
48  
49  
50  
51  
52  
53  
54  
55  
56  
57  
58  
59  
60



Table 1: Patient demographics and outcomes (Median, IQR) by overall satisfaction response

| Variable                                                 | Satisfied    | Not satisfied | Sig.    |
|----------------------------------------------------------|--------------|---------------|---------|
| Age                                                      | 70.3 (13.8)  | 70.0 (14.4)   | 0.829   |
| Gender                                                   |              |               |         |
| Female, n =                                              | 2354 (87%)   | 354 (13%)     |         |
| Male, n =                                                | 1725 (86%)   | 276 (14%)     | 0.473   |
| Joint                                                    |              |               |         |
| THA, n =                                                 | 2215 (90.0%) | 247 (10.0%)   |         |
| TKA, n =                                                 | 1864 (83.0%) | 383 (17.0%)   | <0.001  |
| Number of co-morbidities                                 | 2 (2)        | 2 (2)         | < 0.001 |
| Length of stay (days)                                    | 5 (3)        | 6 (2)         | < 0.001 |
| <b>Satisfaction with specific facets (median scores)</b> |              |               |         |
| Pain relief in affected joint                            | excellent    | fair          | < 0.001 |
| Ability to perform activities                            | very good    | poor          | < 0.001 |
| Ability to perform heavy work or sports                  | good         | poor          | < 0.001 |
| Meeting of expectations                                  | very good    | poor          | < 0.001 |
| Rating of hospital experience                            | very good    | good          | < 0.001 |
| <b>Attitudes towards further surgery</b>                 |              |               |         |
| Would you have the surgery again (yes)                   | 3688 (92%)   | 223 (36%)     | < 0.001 |
| Would you recommend the operation to another (yes)       | 3936 (97%)   | 292 (48%)     | < 0.001 |
| <b>Patient Reported Outcome Questionnaires</b>           |              |               |         |
| <b>Pre-operative</b>                                     |              |               |         |
| SF-12 PCS, median (IQR)                                  | 28.6 (9.4)   | 27.2 (8.1)    | 0.001   |
| SF -12 MCS, median (IQR)                                 | 50.9 (19.2)  | 43.8 (20.3)   | < 0.001 |
| Oxford Score, median (IQR)                               | 19.0 (12.0)  | 16.0 (10.0)   | < 0.001 |
| <b>6 months</b>                                          |              |               |         |
| SF-12 PCS, median (IQR)                                  | 41.8 (16.7)  | 30.4 (9.3)    | < 0.001 |
| SF -12 MCS, median (IQR)                                 | 56.5 (12.6)  | 43.2 (19.2)   | < 0.001 |
| Oxford Score, median (IQR)                               | 39.0 (12.0)  | 24.0 (14.0)   | < 0.001 |
| <b>12 months</b>                                         |              |               |         |
| SF-12 PCS, median (IQR)                                  | 44.1 (17.9)  | 29.4 (8.7)    | < 0.001 |
| SF -12 MCS, median (IQR)                                 | 56.2 (12.7)  | 41.7 (16.9)   | < 0.001 |
| Oxford Score, median (IQR)                               | 41.0 (11.0)  | 23.0 (12.0)   | < 0.001 |

Highly significant correlations of modest-strong strength were found between overall satisfaction and the satisfaction with the specific aspects of surgical outcome (Table 2). Highly significant correlations of modest-strong strength were also apparent between overall satisfaction and the attitudes towards further surgery; 'Would you have the surgery again' ( $r = 0.59$ ,  $p = <0.001$ ) and 'Would you recommend the operation to another' ( $r = 0.63$ ,  $p = <0.001$ ).

**Table 2: correlations between overall satisfaction response and satisfaction with individual facets of surgical outcome**

| Correlation with overall satisfaction   | <i>rho</i> | Sig.   |
|-----------------------------------------|------------|--------|
| meeting of expectations                 | 0.74       | <0.001 |
| pain relief in affected joint           | 0.72       | <0.001 |
| ability to perform activities           | 0.65       | <0.001 |
| ability to perform heavy work or sports | 0.43       | <0.001 |
| rating of hospital experience           | 0.43       | <0.001 |

All 21 variables were entered into a stepwise binary regression model. 5 of these variables were predictive of overall satisfaction with outcome; (1) Meeting pre-operative expectations, (2) satisfaction with pain relief, (3) satisfaction with the overall hospital experience, (4) pre-operative and (5) 12 month Oxford Scores (Table 3). There was no statistically significant difference between the observed probabilities and those predicted by the model (Hosmer-Lemeshow goodness-of-fit test,  $\chi^2 = 5.654$ ,  $p = 0.686$ ). Thus the model could be considered as a good fit. Overall, the model was able to correctly predict 97% of those who were satisfied. A change of 1 category (on the 0-6 category scale) of meeting expectations or satisfaction with pain relief resulted in being 2-3 times more likely to be satisfied with outcome.

**Table 3: Significant predictors of being satisfied with outcome**

| Variable                                  | Sig.  | Odds ratio | CI            |
|-------------------------------------------|-------|------------|---------------|
| having expectations met                   | <.001 | 2.62       | 2.237 – 3.073 |
| satisfaction with pain relief             | <.001 | 2.40       | 1.999 – 2.867 |
| satisfaction with the hospital experience | <.001 | 1.67       | 1.454 – 1.908 |
| 12 month Oxford Score                     | <.001 | 1.08       | 1.052 – 1.103 |
| pre-op Oxford Score                       | <.001 | 0.95       | 0.927 – 0.973 |

A noted ceiling effect on post-operative Oxford Scores (that is potentially problematic when performing regression modelling) led us to review our data. Ceiling effects are of concern if 15% or more of respondents report the highest value. In our data 374 patients (only 8% of the total number of respondents) reported the highest possible score.

## DISCUSSION

This study demonstrates high levels of overall patient satisfaction following total joint arthroplasty and suggests that this is primarily based on three facets; meeting pre-operative expectations of surgery, achieving satisfactory pain relief following surgery and the overall hospital experience. These three factors drove a model which was able to explain 97% of the variation in the patient's overall satisfaction response. It is important to highlight that various factors previously reported to influence clinical outcome (as measured by PROM scores); such as patient age, gender, co-morbidities, length of post-operative stay, mental health (SF-12 MCS), general physical health (SF-12 PCS) and whether the hip or knee joint was replaced did not help explain variation in overall patient satisfaction.

Despite national efforts of categorisation, using patient reported assessment tools, patient outcome following joint arthroplasty remains poorly understood and a highly complex construct to measure. Indeed Carr et al<sup>15</sup> speculate that it is highly unlikely a single universal instrument that is valid for all aspects and domains of outcome will ever be developed. Overall patient satisfaction following joint arthroplasty is thought broadly to relate to PROM scores<sup>3, 16</sup> however this relationship is not well established. Studies in general medicine have found conflicting associations between the patient's experience of intervention and the technical quality of the care delivered as measured by other means<sup>17-19</sup>. Though associated, outcome and satisfaction are not the same metric; current patient report instruments do not account for satisfaction, though this is perhaps the most important criterion of operative success.

The concept of satisfaction is most widely employed in consumer marketing and can be defined as "an attitude like judgement following an act, based on a series of product-consumer interactions"<sup>20</sup>. It has been used as a health care performance indicator for surgery in the UK<sup>17</sup>, Europe<sup>9</sup> and notably for cancer services<sup>21</sup> and cosmetic procedures in the USA<sup>22</sup>. Mira et al<sup>9</sup> report 75% satisfaction in a large sample of patients (undergoing urology, traumatology, ophthalmology and general surgery) discharged in a two month period from multiple Spanish hospitals. They found that in addition to successful surgical procedure other facets relating to the experience of the surgical episode such as previous explanation of the procedure, provision of information at admission and at discharge, and quickness of response on the ward all substantially influenced the patients overall satisfaction response. Recently Judge et al<sup>4, 23</sup> have assessed the relevant change in Oxford Score that corresponds to satisfaction with joint arthroplasty using receiver operating characteristic (ROC) curve analysis. A threshold of 38 points at 12 months and 11 point change in Oxford Hip Score or 14 point change in Oxford Knee Score (from pre-operative score) is suggested as being predictive of

1  
2  
3 satisfaction<sup>4, 23</sup>. The thresholds presented however vary with the pre-operative score. Judge et al<sup>23</sup>  
4 also show how the widespread attempts to use PROMs data to prioritise patients for arthroplasty  
5 surgery is ineffective, demonstrating that pre-operative Oxford Scores in isolation have no predictive  
6 accuracy in deriving post-operative satisfaction. In the analysis presented here, both pre-operative  
7 and one year Oxford Scores contributed to the final regression model, reflecting the patient's change  
8 in outcome score, though neither carried much influence, with odds ratios close to 1. Mental  
9 health<sup>24</sup> has been suggested to influence outcome (as measured by PROMS), and though our data  
10 highlights that dissatisfied patients generally reported worse mental health scores, it was not a  
11 predictor of overall satisfaction in multivariate modelling controlling for confounding. Neither were  
12 differences in post-operative length of hospital stay or level of satisfaction between patients  
13 undergoing THA and those undergoing TKA surgery relevant to the final model.  
14  
15  
16  
17  
18  
19  
20

21  
22 PROM scores are useful tools for the assessment of clinical outcome, in which they focus primarily  
23 on pain relief<sup>25, 26</sup>. This analysis highlights that while pain relief is very relevant to patient  
24 satisfaction; it is not the sole driver. It is quite possible for patients to report good levels of pain  
25 relief and overall dissatisfaction or vice versa. Marrying of expectations and resultant perception of  
26 outcome has been suggested as a model for understanding satisfaction response in the marketing  
27 literature<sup>10</sup>. Baker et al<sup>2</sup> suggest that failure to meet optimistic expectations is associated with  
28 dissatisfaction following joint arthroplasty, and the fulfilment of expectation has been correlated to  
29 satisfaction with outcome<sup>8</sup>. Mannion et al<sup>27</sup> however suggest that actual status (pain and function) of  
30 the individual may be more predictive of satisfaction than expectations of outcome using  
31 multivariate modelling techniques. We suggest that the meeting pre-operative expectations is an  
32 equally important factor as achieving satisfactory pain relief post-operatively, with both factors  
33 demonstrating an odds ratio of close to 3 points. Perhaps most interesting is the inclusion of the  
34 rating of overall hospital experience as the only other factor in the model. This aspect has not been  
35 well investigated in the arthroplasty literature and reflects the important role of the patient's  
36 experience of their interaction with hospital services as to their final satisfaction with the service  
37 provided.  
38  
39  
40  
41  
42  
43  
44  
45  
46  
47

48  
49 Three 'pillars of quality in healthcare' for the NHS have been recently defined; patient safety, clinical  
50 effectiveness, and the patient experience<sup>17, 28</sup>. The patient experience metric is thought to help  
51 assess the strengths and weaknesses of patient safety and clinical effectiveness and drive  
52 improvements in these components<sup>17</sup>. Interestingly, these 'Pillars' are notably similar to previously  
53 proposed 'components of healthcare satisfaction'; structure, process and outcome<sup>29</sup>. Taken  
54 together, these suggestions emphasise that the patient's satisfaction following a surgical procedure  
55  
56  
57  
58  
59  
60

1  
2  
3 is not limited to the outcomes of the intervention, but influenced by the experience of the event as a  
4 whole, from pre-operative consultation to post-operative review. Our findings perhaps help  
5 quantify these broad concepts in the context of joint replacement.  
6  
7  
8  
9

### 10 11 **Strengths and Limitations**

12  
13 This study includes a large patient cohort from a single NHS orthopaedic centre with multiple  
14 surgeons. Valid and reliable instruments for assessing change in health status and outcome of joint  
15 arthroplasty have been used, and data has been collected prospectively with a good rate of follow-  
16 up. The level of satisfaction we report is strikingly similar to that recorded in the 2005 national joint  
17 registry postal survey<sup>5</sup> (90% satisfaction with hip replacement and 82% satisfaction with knee  
18 replacement). As we have pre-operative data we were able to model how the change in pain and  
19 function related to satisfaction. This is important, as it is likely that satisfaction depends not on the  
20 post-operative status, but on the change in status<sup>2</sup>. A noted ceiling effect on post-operative Oxford  
21 Scores may unduly influence regression modelling such as is reported here. Terwee<sup>30</sup> suggests that  
22 ceiling effects can be considered as present in a health status measure if 15% or more of  
23 respondents report the highest value. We are confident that our analysis has not been limited by  
24 this as less than 10% of our data was at the upper score limit.  
25  
26  
27  
28  
29  
30  
31  
32

33  
34 As most patients report high satisfaction with joint arthroplasty there is some doubt as to how  
35 discriminating this measure is, and caution has been advised in the use of a standardised instrument  
36 for the measurement of satisfaction<sup>23</sup>. It is recommended that satisfaction questions should be  
37 context and objective specific rather than generic. Although the additional questions we asked were  
38 not formally validated as a measure of satisfaction, they were directed explicitly at aspects relating  
39 to joint arthroplasty allowing a more in-depth analysis of the individual factors that contribute to  
40 overall satisfaction. Though probably reflective of other interventions, the actual generalizability of  
41 these findings to other surgical procedures is not known. Satisfaction is significantly influenced by  
42 clinical outcome (pain relief, and the avoidance of complications). However it is also significantly  
43 influenced by the pathway to care and the hospital experience. The relative proportions to which  
44 these factors contribute towards overall satisfaction are likely to differ by condition or treatment  
45 depending on the success of treatment for different conditions. The most appropriate time point for  
46 assessing satisfaction has not been described; with some authors reporting satisfaction immediately  
47 post discharge. We chose to survey our patient's satisfaction with outcome 12 months following the  
48 index procedure as this is a time commonly agreed to represent the final outcome and is consistent  
49  
50  
51  
52  
53  
54  
55  
56  
57  
58  
59  
60

1  
2  
3 with other arthroplasty studies. Waiting times for surgery are also thought to influence satisfaction,  
4 though we were not able to assess this in our study, as all patients were operated on within 12  
5 weeks of being listed for procedure, as is a requirement of planned surgical intervention in Scotland.  
6  
7  
8  
9

10  
11 Recently there has been a focus on quality in the NHS (improving clinical outcomes and reducing  
12 complications) which has been highly successful. Significant reductions in hospital acquired  
13 infections, waiting times and specific procedure related problems (such as dislocation following hip  
14 replacement) are all reported, yet patient satisfaction with outcome has remained constant over this  
15 timeframe<sup>2-6</sup>, and overall satisfaction with the NHS as a whole has actually declined<sup>32</sup>. In marketing it  
16 has been suggested that, focussing on service quality alone, without appreciating how it is delivered,  
17 is setting the stage for *'lower customer retention'*<sup>33</sup>. This remains true when applied to healthcare  
18 environment, indeed Baker et al<sup>34</sup> note that better performance (in delivering joint replacement  
19 outcomes) may bring the reward of more customers, as patients and commissioners seek out high  
20 performers for their elective procedures. We speculate that as surgical outcomes have been  
21 consistent, and complications reduced, the national reduction in satisfaction with the NHS may in  
22 part be due to fragmented pathways of care to surgery and a concentration on administering time  
23 targets rather than managing patient care in its wider context.  
24  
25  
26  
27  
28  
29  
30  
31  
32

33 In conclusion, overall patient satisfaction following joint arthroplasty is significantly affected by  
34 fulfilment of pre-surgical expectations, symptomatic pain relief achieved following surgery and the  
35 hospital experience. The Oxford Scores contributed a minimal additional influence in a model which  
36 explained 97% of the variation in overall satisfaction response. Focussing on administration of  
37 waiting lists as opposed to managing the patient's experience may be influencing the observed  
38 reduction of satisfaction with healthcare delivery. This is particularly evident for joint replacement in  
39 NHS facilities, where emergency admissions often de-prioritise "elective" surgeries leading to  
40 differences in satisfaction between units focussed on the patient pathway for one condition or  
41 treatment and those providing the generality of care where focus has been blurred and priority is  
42 given to emergency services.  
43  
44  
45  
46  
47  
48  
49  
50  
51  
52

### 53 **Executive licence**

54 "The Corresponding Author has the right to grant on behalf of all authors and does grant on behalf of all  
55 authors, a worldwide licence to the Publishers and its licensees in perpetuity, in all forms, formats and media  
56 (whether known now or created in the future), to i) publish, reproduce, distribute, display and store the  
57 Contribution, ii) translate the Contribution into other languages, create adaptations, reprints, include within  
58  
59  
60

collections and create summaries, extracts and/or, abstracts of the Contribution, iii) create any other derivative work(s) based on the Contribution, iv) to exploit all subsidiary rights in the Contribution, v) the inclusion of electronic links from the Contribution to third party material where-ever it may be located; and, vi) licence any third party to do any or all of the above."

### Funding

No specific funding was received in relation to this study.

### Declaration of competing interests

"All authors have completed the Unified Competing Interest form at [www.icmje.org/coi\\_disclosure.pdf](http://www.icmje.org/coi_disclosure.pdf) (available on request from the corresponding author) and declare: no support from any organisation for the submitted work; The arthroplasty database is supported by an educational grant to the University of Edinburgh (AHRW Simpson) by Stryker Orthopaedics, P Gaston has previously worked as a consultant for Stryker Orthopaedics, CR Howie is the president elect of the British Orthopaedic Association. The authors declare no additional potential conflict of interest with the submitted work. "

### Contributorship statement

All authors contributed to the conception and design, or analysis and interpretation of data, drafting the article or revising it critically for important intellectual content and final approval of the version to be published. CRH is the guarantor.

### Data Sharing

The dataset is available via the corresponding author though is subject to approval of the data manager due to NHS restrictions in place to protect patient confidentiality.

### REFERENCES

<sup>1</sup>Appleby JA, Lee L. 2012. Health care in Britain: Is there a problem and what needs to change? In: Park, A., Clery, E., Curtice, J., Phillips, M. and Utting, D. (eds.) *British Social Attitudes: the 29th Report* [online] London: NatCen Social Research. Available from <http://www.bsa-29.natcen.ac.uk>.

<sup>2</sup>Baker PN, van der Meulen JH, Lewsey J, et al. The role of pain and function in determining patient satisfaction after total knee replacement. *J Bone Joint Surg Br* 2007;89(7):893-900.

<sup>3</sup>Hamilton D, Henderson GR, Gaston P, et al. Comparative outcomes of total hip and knee arthroplasty: a prospective cohort study. *Postgrad Med J*. 2012;88(1045):627-31



1  
2  
3  
4  
5  
6  
7  
8  
9  
10  
11  
12  
13  
14  
15  
16  
17  
18  
19  
20  
21  
22  
23  
24  
25  
26  
27  
28  
29  
30  
31  
32  
33  
34  
35  
36  
37  
38  
39  
40  
41  
42  
43  
44  
45  
46  
47  
48  
49  
50  
51  
52  
53  
54  
55  
56  
57  
58  
59  
60

<sup>4</sup>Judge A, Arden NK, Kiran A, et al. Interpretation of patient-reported outcomes for hip and knee replacement surgery: identification of thresholds associated with satisfaction with surgery. *J Bone Joint Surg Br*. 2012;94(3):412-8.

<sup>5</sup>National Joint Registry. 2<sup>nd</sup> Annual Report. Hemmel Hempstead, UK: National Joint registry for England and Wales, 2005, <http://www.njrcentre.org.uk> (20<sup>th</sup> October last accessed)

<sup>6</sup>Robertsson O, Dunbar M, Pehrsson T, et al. Patient satisfaction after knee arthroplasty. *Acta Orthop Scand* 2000;71(3):262-67.

<sup>7</sup>Heck D, Robinson RL, Partridge CM, et al. Patient outcomes after knee replacement. *Clin Orthop Relat Res* 1998;356:93-110.

<sup>8</sup>Scott CEH, Bugler KE, Clement ND, et al. Patient expectations of arthroplasty of the hip and knee. *J Bone Joint Surg [Br]* 2012;94: 974-981

<sup>9</sup>Mira JJ, Toma's O, Virtudes-Pérez M, et al. Predictors of patient satisfaction in surgery. *Surgery*, 2009;145:536-541

<sup>10</sup>Larsson WB, Larsson G, Chantreau MW, et al. International comparisons of patients' views on quality of care. *Int J Health Care Qual Assur Inc Leadersh Health Serv* 2005;18:62-73.

<sup>11</sup>McLafferty R, Williams R, Lambert A, et al. Surgeon communication behaviors that lead patients to not recommend the surgeon to family members or friends: analysis and impact. *Surgery* 2006;140:616-24.

<sup>12</sup>Dawson J, Fitzpatrick R, Carr A, et al. Questionnaire on the perceptions of patients about total hip replacement. *J Bone Joint Surg Br* 1996;78-B:185-90.

<sup>13</sup>Dawson J, Fitzpatrick R, Murray, D, et al. Questionnaire on the perceptions of patients about total knee replacement. *J Bone Joint Surg Br* 1998;80-B(1):61-9.

<sup>14</sup>Ware JE and Sherbourne CD. The MOS 36-item Short-form Health Survey (SF-36). *Med Care* 1992;30(6):473-83.

<sup>15</sup>Carr AJ, Robertsson O, Graves S, et al. Knee replacement. *Lancet*. 2012;379(9823):1331-40. Epub 2012 Mar 6. Review.

<sup>16</sup>Anderson JG, Wixson RI, Tsai D, et al. Functional outcome and patient satisfaction in total knee patients over the age of 75. *J. Arthroplasty* 1996;11:831-40

<sup>17</sup>Doyle C, Lennox L, Bell D. A systematic review of evidence on the links between patient experience and clinical safety and effectiveness. *BMJ Open* 2013;3:e001570.



- 1  
2  
3<sup>18</sup>Rao M, Clarke A, Sanderson C, et al. Patients' own assessments of quality of primary care compared with  
4 objective records based measures of technical quality of care: cross sectional study. *BMJ* 2006;333:19–22.  
5  
6  
7<sup>19</sup>Chang JT, Hays RD, Shekelle PG, et al. Patients' global ratings of their health care are not associated with the  
8 technical quality of their care. *Ann Intern Med* 2006;145:635–6.  
9  
10<sup>20</sup>Fournire S and Mick DG. 1999, Rediscovering satisfaction *Journal of Marketing* 63(4) 5-19).  
11  
12  
13<sup>21</sup>Tisnado DM et al. Financial incentives for quality in breast cancer care. *Am J Manag Care* 14(7) 457-466).  
14  
15<sup>22</sup>Broughton G, Horton B, Lipschitz A, et al. Lifestyle outcomes, satisfaction, and attitudes of patients after  
16 liposuction: a Dallas experience. *Plast Reconstr Surg* 2006;117:1738-49.  
17  
18<sup>23</sup>Judge A, Arden NK, Price A, et al. Assessing patients for joint replacement: can pre-operative Oxford hip and  
19 knee scores be used to predict patient satisfaction following joint replacement surgery and to guide patient  
20 selection? *J Bone Joint Surg Br.* 2011;93(12):1660-4  
21  
22<sup>24</sup>Brander VA, Gondek S, Martin E, Stulberg SD. Pain and depression influence outcome 5 years after knee  
23 replacement surgery. *Clin Orthop Relat Res* 2007;464:21-6.  
24  
25<sup>27</sup>Mannion AF, Kämpfen S, Munzinger U, et al. The role of patient expectations in predicting outcome after  
26 total knee arthroplasty. *Arthritis Res Ther.* 2009;11(5):R139. Epub 2009 Sep 21.  
27  
28<sup>25</sup>Hamilton DF, Gaston P, Simpson AHRW. Is patient reporting of physical function accurate following total  
29 knee arthroplasty? *J Bone Joint Surg Br* 2012;11:1506-1510  
30  
31<sup>26</sup>Terwee CB, van der Slikke RMA, Van Lummel R, et al. Self-reported physical functioning was more influenced  
32 by pain than performance-based physical functioning in knee-osteoarthritis patients. *J Clin Epidemiol*  
33 2006;59:724-31.  
34  
35<sup>29</sup>Cleary PD, McNeill BJ. Patient satisfaction as an indicator of quality care. *Inquiry* 1988 25(1) 25-36.  
36  
37<sup>28</sup>Frampton L (ed) Exploring the quality challenges. *The clinical services journal* 2012;11(3) 22-25  
38  
39<sup>30</sup>Terwee CB, Bot SDM, de Boer MR, van der Windt DAWM, Knol DL, Dekker J, Bouter LM, de Vet HCW. Quality  
40 criteria were proposed for measurement properties of health status questionnaires. *Journal of Clinical*  
41 *Epidemiology*, Volume 60, Issue 1, January 2007, Pages 34-42.  
42  
43<sup>31</sup>Carr-Hill, R. A. The measurement of patient satisfaction. *Journal of Public Health Medicine* 1992;14(3):236-  
44 49.  
45  
46<sup>32</sup>Torjesen I. 2012. Patient satisfaction with NHS fell by 12% in 2011. *BMJ (Clinical Research Ed)* vol 344  
47 ppe4091.  
48  
49<sup>33</sup>Durvasula S, Lysonski S, Mehta S. Service encounters: the missing link between service quality perceptions  
50 and satisfaction. *J Applied business research* 2005;21(3):15-26  
51  
52  
53<sup>34</sup>Baker PN, Deehan DJ, Lees D, et al. The effect of surgical factors on early patient-reported outcome measures  
54 (PROMS) following total knee replacement. *J Bone Joint Surg Br.* 2012;94(8):1058-66  
55  
56  
57  
58  
59  
60

**What determines patient satisfaction with surgery?**

A PROSPECTIVE COHORT STUDY OF 4709 PATIENTS FOLLOWING TOTAL JOINT REPLACEMENT

Hamilton DF, Lane JV, Gaston P, Patton JT, MacDonald D, Simpson AHRW, Howie CR

Department of Orthopaedics, University of Edinburgh, Edinburgh, EH164SB, UK  
DF Hamilton, Research Fellow; D MacDonald, Research Co-ordinator; AHRW Simpson, Professor of  
Orthopaedics and Trauma

Department of Physiotherapy, Queen Margaret University, Edinburgh, EH21 6UU, UK  
JV Lane, Lecturer

Royal Infirmary of Edinburgh, Little France Crescent, Edinburgh, EH16 4SA, UK  
CR Howie, Consultant Orthopaedic Surgeon; P Gaston, Consultant Orthopaedic Surgeon; JT Patton, Consultant  
Orthopaedic Surgeon

Correspondence to: [d.f.hamilton@ed.ac.uk](mailto:d.f.hamilton@ed.ac.uk)

## Article Summary;

### Article focus

Patient satisfaction rates have been quoted following surgical intervention; and these used to assess the success of interventions.

Clinical care and patient outcomes have improved over recent years, however satisfaction with surgical services has remained constant over this timeframe.

Many factors have been suggested to influence patient satisfaction; however there is little consensus as to which areas of care actually influence overall satisfaction response.

### Key messages

Our study identifies 5 factors that explain 97% of the variation in the patient's overall satisfaction following lower limb joint arthroplasty; (1) meeting of pre-operative expectations, (2) the achievement of satisfactory pain relief, (3) the patients subjective hospital experience, and to a lesser extent (4) pre-operative physical status (Oxford Score) and (5) 12 month physical status (Oxford Score).

Factors that influence clinical outcome scores (PROMS) such as age, gender and co-morbidities do not impact upon satisfaction.

Clinical teams currently aim to manage pre-operative expectations and post-operative pain relief. Management of the patient's hospital experience may then be a key factor in optimizing overall patient satisfaction, which has implications for service delivery.

### Strengths and Limitations

This study benefits from a large prospective patient cohort at a single NHS orthopaedic centre with multiple surgeons.

As most patients report high satisfaction with joint arthroplasty there is some doubt as to how discriminating this measure is, and caution has been advised in the use of a standardised instrument for the measurement of satisfaction.

The wider generalisibility of these results from joint arthroplasty to other surgical procedures is assumed but unconfirmed

**ABSTRACT**

**Objectives:** To investigate the factors which influence patient satisfaction with surgical services and to explore the relationship between overall satisfaction, satisfaction with specific facets of outcome and measured clinical outcomes (Patient Reported Outcome Measures).

**Design:** Prospective cohort study

**Setting:** Single NHS teaching hospital

**Participants:** 4709 individuals undergoing primary lower limb joint replacement over a four year period (Jan 2006 – Dec 2010)

**Main Outcome Measures:** Overall patient satisfaction, clinical outcomes as measured by PROMS (Oxford Hip or Knee Score, SF-12), satisfaction with 5 specific aspects of surgical outcome, attitudes towards further surgery, length of hospital stay.

**Results:** Overall patient satisfaction was predicted by; (1) meeting pre-operative expectations [Odds Ratio 2.62 (95% CI, 2.24-3.07)], (2) satisfaction with pain relief [2.40 (2.00 -2.87)], (3) satisfaction with the hospital experience [1.7 (1.45-1.91)], (4) 12 month [1.08 (1.05-1.10)] and (5) pre-operative [0.95 (0.93-0.97)] Oxford Scores. These 5 factors contributed to a model able to correctly predict 97% of the variation in overall patient satisfaction response. The factors having greatest effect were the degree to which patient expectations were met and satisfaction with pain relief; the Oxford Scores carried little weight in the algorithm. Various factors previously reported to influence clinical outcomes such as age, gender, co-morbidities, length of post-operative hospital stay did not help explain variation in overall patient satisfaction.

**Conclusions:** Three factors broadly determine the patient's overall satisfaction following lower limb joint arthroplasty; meeting pre-operative expectations, achieving satisfactory pain relief, and a satisfactory hospital experience. Pain relief and expectations are managed by clinical teams; however a fractured access to surgical services impacts on the patient's hospital experience which may reduce overall satisfaction. In the absence of complications, how we deliver healthcare may be of key importance along with the specifics of what we deliver, which has clear implications for units providing surgical services.

1  
2  
3 Satisfaction with NHS surgical services has recently declined<sup>1</sup> despite more rapid access to, and  
4 fewer measurable complications from surgical care. There are few procedures or treatments where  
5 the monitoring of outcomes and satisfaction has been consistent enough to investigate this  
6 apparent paradox. Joint replacement is an example of a high volume service that has been closely  
7 monitored over recent years.  
8  
9

10  
11 Traditionally, clinical success has been measured by lack of complications or by specific clinical  
12 parameters, e.g. range of motion or blood pressure control. More recently, clinical outcomes have  
13 been assessed by patient reported outcome measures (PROMS). Patient satisfaction is perhaps the  
14 most important criterion of success. This is well recognised in the service industries, though remains  
15 something of a nebulous concept in clinical care. **Despite the extensive literature on clinical  
16 outcomes following joint arthroplasty, comparatively few studies address patient satisfaction<sup>2</sup>.**

17  
18 Where this is reported, the majority of patients are described as being satisfied with surgical  
19 outcome; though consistent reports of 10-20% dissatisfaction with joint arthroplasty persist<sup>2-6</sup>. A  
20 number of authors have suggested various factors that may influence satisfaction with arthroplasty,  
21 such as post-operative pain or joint stiffness, though our current understanding as to why some  
22 patients are satisfied and others are not remains limited<sup>6-8</sup>. Indeed some patients reporting a bad  
23 clinical outcome, in terms of pain and function, may report good levels of satisfaction with their  
24 surgical outcome and vice versa<sup>2</sup>. **In the wider surgical literature various factors such as meeting of  
25 expectations, staff politeness, the surgeon's communication skills and surgical waiting times have all  
26 been suggested as influencing eventual satisfaction<sup>9-11</sup> though again consensus is elusive.** Clearly  
27 overall satisfaction is a broad concept that encompasses more than simply the clinical outcome.  
28  
29

30  
31 Our aim was to explore the relationship between patient's level of overall satisfaction with their hip  
32 or knee replacement, satisfaction with specific facets of outcome and measured clinical outcomes  
33 (Patient Reported Outcome Measures).  
34  
35  
36  
37  
38  
39  
40  
41  
42  
43  
44  
45  
46

## 47 **METHODS**

48  
49 During a four year period (January 2006 to December 2010) all patients undergoing lower limb joint  
50 replacement at a single hospital were entered into a prospectively collected arthroplasty database,  
51 for which regional ethical approval had been obtained (11/AL/0079). The study questionnaire was  
52 completed by 4709 (95%) patients. This comprised 2462 patients receiving total hip replacement and  
53 2247 receiving total knee replacement. All data were included in the analysis.  
54  
55  
56  
57  
58  
59  
60

1  
2  
3 All patients completed pre-operative PROM questionnaires, Oxford Hip or Knee Score<sup>12, 13</sup> and  
4 Medical Outcomes Study Short Form 12 (SF-12) health assessment<sup>14</sup>, and were sent postal follow-up  
5 questionnaires at 6 and 12 months post-operation to assess outcome and satisfaction. Procedures  
6 were carried out by multiple consultant orthopaedic surgeons and their supervised trainees. All data  
7 was collected independently from the clinical team by the arthroplasty outcomes research unit of  
8 the University of Edinburgh and NHS Lothian.  
9

10  
11  
12 The Oxford Scores consist of 12 questions relating to the patients perceived pain and functional  
13 ability, answered on a Likert scale with values from 0 to 4. The score ranges from 0-48, with overall  
14 score calculated from the responses to the 12 questions. A score of 0 is the worst possible outcome  
15 suggesting severe symptoms and dysfunction, while 48 is the best possible outcome. The SF-12  
16 results in two scores, the physical and mental component summary (PCS and MCS) scores. This score  
17 is calculated using norm-based methodology and population mean scores. Both PCS and MCS have a  
18 population mean score of 50 with standard deviation of 10.  
19

20  
21 Pre-operative information was collected as to the patient's age, gender and presence of co-  
22 morbidities. Post-operative length of stay was recorded upon discharge. At 12 months patients were  
23 also asked to rate their overall satisfaction with their operated hip or knee on a 4 point scale (very  
24 satisfied, satisfied, unsure or dissatisfied). Data on satisfaction with 5 specific facets of surgical  
25 outcome were obtained with the following questions, answered on a 6 point scale (excellently, very  
26 well, well, fairly, poorly, don't know); (1) "how well did the surgery relieve the pain in your affected  
27 joint?" (2) "How well did the surgery increase your ability to perform regular activities?" (3) "How  
28 well did the surgery allow you to perform heavy work or sport activities?" (4) "How well did the  
29 surgery meet your expectations?" We then asked our patients to indicate their satisfaction with the  
30 care they received at the hospital with the question (5) "rate your overall hospital experience" using  
31 the response scale; excellent, very good, good, fair, poor or unknown. We also asked a further 2  
32 questions that enquired as to the patient's attitude towards further surgery; (1) "would you have  
33 this operation again if it were required on another joint?" and (2) "would you recommend this  
34 operation to someone else?" (Possible responses: Definitely yes, possibly yes, probably not, certainly  
35 not or not sure). These were included to mimic the modelling done in marketing research, where  
36 return visits are considered a successful outcome.  
37  
38  
39  
40  
41  
42  
43  
44  
45  
46  
47  
48  
49  
50

### 51 52 **Statistical analysis**

53  
54  
55 Data were assessed with SPSS version 17 (IBM). Data were not normally distributed and therefore  
56 variables have been presented as median and inter-quartile ranges. The satisfaction score at 1 year  
57  
58  
59  
60

1  
2  
3 was simplified into a binary variable of whether or not the patient was satisfied with the surgery.  
4 Those who reported 'satisfied' or 'very satisfied' were categorised as satisfied. Those who were  
5 either 'unsure' or 'not satisfied' were categorised as 'not satisfied'. 86.6% of patients were either  
6 very satisfied or satisfied, and 13.4% were unsure or not satisfied. Bivariate analysis was undertaken  
7 to determine whether differences in outcome were associated by satisfaction status. Logistic  
8 regression analysis was then performed to determine the variables associated with satisfaction at  
9 one year. Multivariate modelling, using a stepwise binary building technique, was employed with  
10 predictive variables selected if their bivariate significance was  $p = 0.1$  to accommodate the possibility  
11 of variable achieving statistical significance once the confounding effect of another variable was  
12 controlled.  
13  
14  
15  
16  
17  
18  
19  
20  
21

## 22 RESULTS

23  
24 Demographic details are described in table 1, split dichotomously into satisfied or unsatisfied patient  
25 groups. Age and gender were not associated with differences in satisfaction, however a significantly  
26 higher proportion of the THA group were satisfied than the TKA group (Table 1,  $\chi^2 = 49.85$ ,  $p <$   
27  $0.001$ ). The median number of co-morbidities (2) was the same though is reported as being  
28 statistically different between groups; as the Mann-Whitney test does not actually compare the  
29 medians but looks at the ranking of all of the data, which allows for this apparent contradiction.  
30 Median length of stay differed by a single day between those who were satisfied and those who  
31 were not, which was statistically significant. All patient reported outcome scores (including pre-  
32 operative scores) were significantly better in the satisfied group. Satisfaction with the specific  
33 aspects of surgical outcome, the hospital experience and the attitude towards further surgery were  
34 all significantly greater ( $p = 0.001$ ) in those who reported overall satisfaction with outcome.  
35  
36  
37  
38  
39  
40  
41  
42  
43  
44  
45  
46  
47  
48  
49  
50  
51  
52  
53  
54  
55  
56  
57  
58  
59  
60

Table 1: Patient demographics and outcomes (Median, IQR) by overall satisfaction response

| Variable                                                 | Satisfied    | Not satisfied | Sig.    |
|----------------------------------------------------------|--------------|---------------|---------|
| Age                                                      | 70.3 (13.8)  | 70.0 (14.4)   | 0.829   |
| Gender                                                   |              |               |         |
| Female, n =                                              | 2354 (87%)   | 354 (13%)     |         |
| Male, n =                                                | 1725 (86%)   | 276 (14%)     | 0.473   |
| Joint                                                    |              |               |         |
| THA, n =                                                 | 2215 (90.0%) | 247 (10.0%)   |         |
| TKA, n =                                                 | 1864 (83.0%) | 383 (17.0%)   | <0.001  |
| Number of co-morbidities                                 | 2 (2)        | 2 (2)         | < 0.001 |
| Length of stay (days)                                    | 5 (3)        | 6 (2)         | < 0.001 |
| <b>Satisfaction with specific facets (median scores)</b> |              |               |         |
| Pain relief in affected joint                            | excellent    | fair          | < 0.001 |
| Ability to perform activities                            | very good    | poor          | < 0.001 |
| Ability to perform heavy work or sports                  | good         | poor          | < 0.001 |
| Meeting of expectations                                  | very good    | poor          | < 0.001 |
| Rating of hospital experience                            | very good    | good          | < 0.001 |
| <b>Attitudes towards further surgery</b>                 |              |               |         |
| Would you have the surgery again (yes)                   | 3688 (92%)   | 223 (36%)     | < 0.001 |
| Would you recommend the operation to another (yes)       | 3936 (97%)   | 292 (48%)     | < 0.001 |
| <b>Patient Reported Outcome Questionnaires</b>           |              |               |         |
| <b>Pre-operative</b>                                     |              |               |         |
| SF-12 PCS, median (IQR)                                  | 28.6 (9.4)   | 27.2 (8.1)    | 0.001   |
| SF -12 MCS, median (IQR)                                 | 50.9 (19.2)  | 43.8 (20.3)   | < 0.001 |
| Oxford Score, median (IQR)                               | 19.0 (12.0)  | 16.0 (10.0)   | < 0.001 |
| <b>6 months</b>                                          |              |               |         |
| SF-12 PCS, median (IQR)                                  | 41.8 (16.7)  | 30.4 (9.3)    | < 0.001 |
| SF -12 MCS, median (IQR)                                 | 56.5 (12.6)  | 43.2 (19.2)   | < 0.001 |
| Oxford Score, median (IQR)                               | 39.0 (12.0)  | 24.0 (14.0)   | < 0.001 |
| <b>12 months</b>                                         |              |               |         |
| SF-12 PCS, median (IQR)                                  | 44.1 (17.9)  | 29.4 (8.7)    | < 0.001 |
| SF -12 MCS, median (IQR)                                 | 56.2 (12.7)  | 41.7 (16.9)   | < 0.001 |
| Oxford Score, median (IQR)                               | 41.0 (11.0)  | 23.0 (12.0)   | < 0.001 |

Highly significant correlations of modest-strong strength were found between overall satisfaction and the satisfaction with the specific aspects of surgical outcome (Table 2). Highly significant correlations of modest-strong strength were also apparent between overall satisfaction and the attitudes towards further surgery; 'Would you have the surgery again' ( $r = 0.59$ ,  $p = <0.001$ ) and 'Would you recommend the operation to another' ( $r = 0.63$ ,  $p = <0.001$ ).



**Table 2: correlations between overall satisfaction response and satisfaction with individual facets of surgical outcome**

| Correlation with overall satisfaction   | <i>rho</i> | Sig.   |
|-----------------------------------------|------------|--------|
| meeting of expectations                 | 0.74       | <0.001 |
| pain relief in affected joint           | 0.72       | <0.001 |
| ability to perform activities           | 0.65       | <0.001 |
| ability to perform heavy work or sports | 0.43       | <0.001 |
| rating of hospital experience           | 0.43       | <0.001 |

All 21 variables were entered into a stepwise binary regression model. 5 of these variables were predictive of overall satisfaction with outcome; (1) Meeting pre-operative expectations, (2) satisfaction with pain relief, (3) satisfaction with the overall hospital experience, (4) pre-operative and (5) 12 month Oxford Scores (Table 3). There was no statistically significant difference between the observed probabilities and those predicted by the model (Hosmer-Lemeshow goodness-of-fit test,  $\chi^2 = 5.654$ ,  $p = 0.686$ ). Thus the model could be considered as a good fit. Overall, the model was able to correctly predict 97% of those who were satisfied. A change of 1 category (on the 0-6 category scale) of meeting expectations or satisfaction with pain relief resulted in being 2-3 times more likely to be satisfied with outcome.

**Table 3: Significant predictors of being satisfied with outcome**

| Variable                                  | Sig.  | Odds ratio | CI            |
|-------------------------------------------|-------|------------|---------------|
| having expectations met                   | <.001 | 2.62       | 2.237 – 3.073 |
| satisfaction with pain relief             | <.001 | 2.40       | 1.999 – 2.867 |
| satisfaction with the hospital experience | <.001 | 1.67       | 1.454 – 1.908 |
| 12 month Oxford Score                     | <.001 | 1.08       | 1.052 – 1.103 |
| pre-op Oxford Score                       | <.001 | 0.95       | 0.927 – 0.973 |

A noted ceiling effect on post-operative Oxford Scores (that is potentially problematic when performing regression modelling) led us to review our data. Ceiling effects are of concern if 15% or more of respondents report the highest value. In our data 374 patients (only 8% of the total number of respondents) reported the highest possible score.

## DISCUSSION

This study demonstrates high levels of overall patient satisfaction following total joint arthroplasty and suggests that this is primarily based on three facets; meeting pre-operative expectations of surgery, achieving satisfactory pain relief following surgery and the overall hospital experience. These three factors drove a model which was able to explain 97% of the variation in the patient's overall satisfaction response. It is important to highlight that various factors previously reported to influence clinical outcome (as measured by PROM scores); such as patient age, gender, co-morbidities, length of post-operative stay, mental health (SF-12 MCS), general physical health (SF-12 PCS) and whether the hip or knee joint was replaced did not help explain variation in overall patient satisfaction.

Despite national efforts of categorisation, using patient reported assessment tools, patient outcome following joint arthroplasty remains poorly understood and a highly complex construct to measure. Indeed Carr et al<sup>15</sup> speculate that it is highly unlikely a single universal instrument that is valid for all aspects and domains of outcome will ever be developed. Overall patient satisfaction following joint arthroplasty is thought broadly to relate to PROM scores<sup>3, 16</sup> however this relationship is not well established. Studies in general medicine have found conflicting associations between the patient's experience of intervention and the technical quality of the care delivered as measured by other means<sup>17-19</sup>. Though associated, outcome and satisfaction are not the same metric; current patient report instruments do not account for satisfaction, though this is perhaps the most important criterion of operative success.

The concept of satisfaction is most widely employed in consumer marketing and can be defined as "an attitude like judgement following an act, based on a series of product-consumer interactions"<sup>20</sup>. It has been used as a health care performance indicator for surgery in the UK<sup>17</sup>, Europe<sup>9</sup> and notably for cancer services<sup>21</sup> and cosmetic procedures in the USA<sup>22</sup>. Mira et al<sup>9</sup> report 75% satisfaction in a large sample of patients (undergoing urology, traumatology, ophthalmology and general surgery) discharged in a two month period from multiple Spanish hospitals. They found that in addition to successful surgical procedure other facets relating to the experience of the surgical episode such as previous explanation of the procedure, provision of information at admission and at discharge, and quickness of response on the ward all substantially influenced the patients overall satisfaction response. Recently Judge et al<sup>4, 23</sup> have assessed the relevant change in Oxford Score that corresponds to satisfaction with joint arthroplasty using receiver operating characteristic (ROC) curve analysis. A threshold of 38 points at 12 months and 11 point change in Oxford Hip Score or 14 point change in Oxford Knee Score (from pre-operative score) is suggested as being predictive of

1  
2  
3 satisfaction<sup>4, 23</sup>. The thresholds presented however vary with the pre-operative score. Judge et al<sup>23</sup>  
4 also show how the widespread attempts to use PROMs data to prioritise patients for arthroplasty  
5 surgery is ineffective, demonstrating that pre-operative Oxford Scores in isolation have no predictive  
6 accuracy in deriving post-operative satisfaction. In the analysis presented here, both pre-operative  
7 and one year Oxford Scores contributed to the final regression model, reflecting the patient's change  
8 in outcome score, though neither carried much influence, with odds ratios close to 1. Mental  
9 health<sup>24</sup> has been suggested to influence outcome (as measured by PROMS), and though our data  
10 highlights that dissatisfied patients generally reported worse mental health scores, it was not a  
11 predictor of overall satisfaction in multivariate modelling controlling for confounding. **Neither were**  
12 **differences in post-operative length of hospital stay or level of satisfaction between patients**  
13 **undergoing THA and those undergoing TKA surgery relevant to the final model.**

14  
15  
16 PROM scores are useful tools for the assessment of clinical outcome, in which they focus primarily  
17 on pain relief<sup>25, 26</sup>. **This analysis highlights that while pain relief is very relevant to patient**  
18 **satisfaction; it is not the sole driver. It is quite possible for patients to report good levels of pain**  
19 **relief and overall dissatisfaction or vice versa. Marrying of expectations and resultant perception of**  
20 **outcome has been suggested as a model for understanding satisfaction response in the marketing**  
21 **literature<sup>10</sup>. Baker et al<sup>2</sup> suggest that failure to meet optimistic expectations is associated with**  
22 **dissatisfaction following joint arthroplasty, and the fulfilment of expectation has been correlated to**  
23 **satisfaction with outcome<sup>8</sup>. Mannion et al<sup>27</sup> however suggest that actual status (pain and function) of**  
24 **the individual may be more predictive of satisfaction than expectations of outcome using**  
25 **multivariate modelling techniques. We suggest that the meeting pre-operative expectations is an**  
26 **equally important factor as achieving satisfactory pain relief post-operatively, with both factors**  
27 **demonstrating an odds ratio of close to 3 points. Perhaps most interesting is the inclusion of the**  
28 **rating of overall hospital experience as the only other factor in the model. This aspect has not been**  
29 **well investigated in the arthroplasty literature and reflects the important role of the patient's**  
30 **experience of their interaction with hospital services as to their final satisfaction with the service**  
31 **provided.**

32  
33  
34  
35  
36  
37  
38  
39  
40  
41  
42  
43  
44  
45  
46  
47  
48  
49  
50  
51  
52  
53  
54  
55  
56  
57  
58  
59  
60  
60  
Three 'pillars of quality in healthcare' for the NHS have been recently defined; patient safety, clinical  
effectiveness, and the patient experience<sup>17, 28</sup>. The patient experience metric is thought to help  
assess the strengths and weaknesses of patient safety and clinical effectiveness and drive  
improvements in these components<sup>17</sup>. Interestingly, these 'Pillars' are notably similar to previously  
proposed 'components of healthcare satisfaction'; structure, process and outcome<sup>29</sup>. Taken  
together, these suggestions emphasise that the patient's satisfaction following a surgical procedure

1  
2  
3 is not limited to the outcomes of the intervention, but influenced by the experience of the event as a  
4 whole, from pre-operative consultation to post-operative review. Our findings perhaps help  
5 quantify these broad concepts in the context of joint replacement.  
6  
7  
8  
9

### 10 11 **Strengths and Limitations**

12  
13 This study includes a large patient cohort from a single NHS orthopaedic centre with multiple  
14 surgeons. Valid and reliable instruments for assessing change in health status and outcome of joint  
15 arthroplasty have been used, and data has been collected prospectively with a good rate of follow-  
16 up. The level of satisfaction we report is strikingly similar to that recorded in the 2005 national joint  
17 registry postal survey<sup>5</sup> (90% satisfaction with hip replacement and 82% satisfaction with knee  
18 replacement). As we have pre-operative data we were able to model how the change in pain and  
19 function related to satisfaction. This is important, as it is likely that satisfaction depends not on the  
20 post-operative status, but on the change in status<sup>2</sup>. A noted ceiling effect on post-operative Oxford  
21 Scores may unduly influence regression modelling such as is reported here. Terwee<sup>30</sup> suggests that  
22 ceiling effects can be considered as present in a health status measure if 15% or more of  
23 respondents report the highest value. We are confident that our analysis has not been limited by  
24 this as less than 10% of our data was at the upper score limit.  
25  
26  
27  
28  
29  
30  
31  
32

33  
34 As most patients report high satisfaction with joint arthroplasty there is some doubt as to how  
35 discriminating this measure is, and caution has been advised in the use of a standardised instrument  
36 for the measurement of satisfaction<sup>23</sup>. It is recommended that satisfaction questions should be  
37 context and objective specific rather than generic. Although the additional questions we asked were  
38 not formally validated as a measure of satisfaction, they were directed explicitly at aspects relating  
39 to joint arthroplasty allowing a more in-depth analysis of the individual factors that contribute to  
40 overall satisfaction. Though probably reflective of other interventions, the actual generalizability of  
41 these findings to other surgical procedures is not known. Satisfaction is significantly influenced by  
42 clinical outcome (pain relief, and the avoidance of complications). However it is also significantly  
43 influenced by the pathway to care and the hospital experience. The relative proportions to which  
44 these factors contribute towards overall satisfaction are likely to differ by condition or treatment  
45 depending on the success of treatment for different conditions. The most appropriate time point for  
46 assessing satisfaction has not been described; with some authors reporting satisfaction immediately  
47 post discharge. We chose to survey our patient's satisfaction with outcome 12 months following the  
48 index procedure as this is a time commonly agreed to represent the final outcome and is consistent  
49  
50  
51  
52  
53  
54  
55  
56  
57  
58  
59  
60

1  
2  
3 with other arthroplasty studies. Waiting times for surgery are also thought to influence satisfaction,  
4 though we were not able to assess this in our study, as all patients were operated on within 12  
5 weeks of being listed for procedure, as is a requirement of planned surgical intervention in Scotland.  
6  
7  
8  
9

10  
11 Recently there has been a focus on quality in the NHS (improving clinical outcomes and reducing  
12 complications) which has been highly successful. Significant reductions in hospital acquired  
13 infections, waiting times and specific procedure related problems (such as dislocation following hip  
14 replacement) are all reported, yet patient satisfaction with outcome has remained constant over this  
15 timeframe<sup>2-6</sup>, and overall satisfaction with the NHS as a whole has actually declined<sup>32</sup>. In marketing it  
16 has been suggested that, focussing on service quality alone, without appreciating how it is delivered,  
17 is setting the stage for 'lower customer retention'<sup>33</sup>. This remains true when applied to healthcare  
18 environment, indeed Baker et al<sup>34</sup> note that better performance (in delivering joint replacement  
19 outcomes) may bring the reward of more customers, as patients and commissioners seek out high  
20 performers for their elective procedures. We speculate that as surgical outcomes have been  
21 consistent, and complications reduced, the national reduction in satisfaction with the NHS may in  
22 part be due to fragmented pathways of care to surgery and a concentration on administering time  
23 targets rather than managing patient care in its wider context.  
24  
25  
26  
27  
28  
29  
30  
31  
32

33 In conclusion, overall patient satisfaction following joint arthroplasty is significantly affected by  
34 fulfilment of pre-surgical expectations, symptomatic pain relief achieved following surgery and the  
35 hospital experience. The Oxford Scores contributed a minimal additional influence in a model which  
36 explained 97% of the variation in overall satisfaction response. Focussing on administration of  
37 waiting lists as opposed to managing the patient's experience may be influencing the observed  
38 reduction of satisfaction with healthcare delivery. This is particularly evident for joint replacement in  
39 NHS facilities, where emergency admissions often de-prioritise "elective" surgeries leading to  
40 differences in satisfaction between units focussed on the patient pathway for one condition or  
41 treatment and those providing the generality of care where focus has been blurred and priority is  
42 given to emergency services.  
43  
44  
45  
46  
47  
48  
49  
50  
51

## 52 Executive licence

53  
54 "The Corresponding Author has the right to grant on behalf of all authors and does grant on behalf of all  
55 authors, [a worldwide licence](#) to the Publishers and its licensees in perpetuity, in all forms, formats and media  
56 (whether known now or created in the future), to i) publish, reproduce, distribute, display and store the  
57 Contribution, ii) translate the Contribution into other languages, create adaptations, reprints, include within  
58  
59  
60

1  
2  
3 collections and create summaries, extracts and/or, abstracts of the Contribution, iii) create any other  
4 derivative work(s) based on the Contribution, iv) to exploit all subsidiary rights in the Contribution, v) the  
5 inclusion of electronic links from the Contribution to third party material where-ever it may be located; and, vi)  
6 licence any third party to do any or all of the above.”  
7  
8  
9

### 10 **Funding**

11  
12 No specific funding was received in relation to this study.  
13

### 14 **Declaration of competing interests**

15  
16 “All authors have completed the Unified Competing Interest form at [www.icmje.org/coi\\_disclosure.pdf](http://www.icmje.org/coi_disclosure.pdf)  
17 (available on request from the corresponding author) and declare: no support from any organisation for the  
18 submitted work; The arthroplasty database is supported by an educational grant to the University of Edinburgh  
19 (AHRW Simpson) by Stryker Orthopaedics, P Gaston has previously worked as a consultant for Stryker  
20 Orthopaedics, CR Howie is the president elect of the British Orthopaedic Association. The authors declare no  
21 additional potential conflict of interest with the submitted work. ”  
22  
23  
24  
25  
26

### 27 **Contributorship statement**

28  
29 All authors contributed to the conception and design, or analysis and interpretation of data, drafting the article  
30 or revising it critically for important intellectual content and final approval of the version to be published. CRH  
31 is the guarantor.  
32  
33  
34

### 35 **Data Sharing**

36  
37 The dataset is available via the corresponding author though is subject to approval of the data manager due to  
38 NHS restrictions in place to protect patient confidentiality.  
39  
40  
41

### 42 **REFERENCES**

43  
44  
45 <sup>1</sup>Appleby JA, Lee L. 2012. Health care in Britain: Is there a problem and what needs to change? In: Park, A.,  
46 Clery, E., Curtice, J., Phillips, M. and Utting, D. (eds.) *British Social Attitudes: the 29th Report* [online] London:  
47 NatCen Social Research. Available from <http://www.bsa-29.natcen.ac.uk>.  
48  
49

50  
51 <sup>2</sup>Baker PN, van der Meulen JH, Lewsey J, et al. The role of pain and function in determining patient satisfaction  
52 after total knee replacement. *J Bone Joint Surg Br* 2007;89(7):893-900.  
53

54  
55 <sup>3</sup>Hamilton D, Henderson GR, Gaston P, et al. Comparative outcomes of total hip and knee arthroplasty: a  
56 prospective cohort study. *Postgrad Med J*. 2012;88(1045):627-31  
57  
58  
59  
60

1  
2  
3  
4  
5  
6  
7  
8  
9  
10  
11  
12  
13  
14  
15  
16  
17  
18  
19  
20  
21  
22  
23  
24  
25  
26  
27  
28  
29  
30  
31  
32  
33  
34  
35  
36  
37  
38  
39  
40  
41  
42  
43  
44  
45  
46  
47  
48  
49  
50  
51  
52  
53  
54  
55  
56  
57  
58  
59  
60

<sup>4</sup>Judge A, Arden NK, Kiran A, et al. Interpretation of patient-reported outcomes for hip and knee replacement surgery: identification of thresholds associated with satisfaction with surgery. *J Bone Joint Surg Br*. 2012;94(3):412-8.

<sup>5</sup>National Joint Registry. 2<sup>nd</sup> Annual Report. Hemmel Hempstead, UK: National Joint registry for England and Wales, 2005, <http://www.njrcentre.org.uk> (20<sup>th</sup> October last accessed)

<sup>6</sup>Robertsson O, Dunbar M, Pehrsson T, et al. Patient satisfaction after knee arthroplasty. *Acta Orthop Scand* 2000;71(3):262-67.

<sup>7</sup>Heck D, Robinson RL, Partridge CM, et al. Patient outcomes after knee replacement. *Clin Orthop Relat Res* 1998;356:93-110.

<sup>8</sup>Scott CEH, Bugler KE, Clement ND, et al. Patient expectations of arthroplasty of the hip and knee. *J Bone Joint Surg [Br]* 2012;94: 974-981

<sup>9</sup>Mira JJ, Toma's O, Virtudes-Pe'rez M, et al. Predictors of patient satisfaction in surgery. *Surgery*, 2009;145:536-541

<sup>10</sup>Larsson WB, Larsson G, Chantereau MW, et al. International comparisons of patients' views on quality of care. *Int J Health Care Qual Assur Inc Leadersh Health Serv* 2005;18:62-73.

<sup>11</sup>McLafferty R, Williams R, Lambert A, et al. Surgeon communication behaviors that lead patients to not recommend the surgeon to family members or friends: analysis and impact. *Surgery* 2006;140:616-24.

<sup>12</sup>Dawson J, Fitzpatrick R, Carr A, et al. Questionnaire on the perceptions of patients about total hip replacement. *J Bone Joint Surg Br* 1996;78-B:185-90.

<sup>13</sup>Dawson J, Fitzpatrick R, Murray, D, et al. Questionnaire on the perceptions of patients about total knee replacement. *J Bone Joint Surg Br* 1998;80-B(1):61-9.

<sup>14</sup>Ware JE and Sherbourne CD. The MOS 36-item Short-form Health Survey (SF-36). *Med Care* 1992;30(6):473-83.

<sup>15</sup>Carr AJ, Robertsson O, Graves S, et al. Knee replacement. *Lancet*. 2012;379(9823):1331-40. Epub 2012 Mar 6. Review.

<sup>16</sup>Anderson JG, Wixson RI, Tsai D, et al. Functional outcome and patient satisfaction in total knee patients over the age of 75. *J. Arthroplasty* 1996;11:831-40

<sup>17</sup>Doyle C, Lennox L, Bell D. A systematic review of evidence on the links between patient experience and clinical safety and effectiveness. *BMJ Open* 2013;3:e001570.



1  
2  
3 <sup>18</sup>Rao M, Clarke A, Sanderson C, et al. Patients' own assessments of quality of primary care compared with  
4 objective records based measures of technical quality of care: cross sectional study. *BMJ* 2006;333:19–22.

5  
6 <sup>19</sup>Chang JT, Hays RD, Shekelle PG, et al. Patients' global ratings of their health care are not associated with the  
7 technical quality of their care. *Ann Intern Med* 2006;145:635–6.

8  
9 <sup>20</sup>Fournire S and Mick DG. 1999, Rediscovering satisfaction *Journal of Marketing* 63(4) 5-19).

10  
11 <sup>21</sup>Tisnado DM et al. Financial incentives for quality in breast cancer care. *Am J Manag Care* 14(7) 457-466).

12  
13 <sup>22</sup>Broughton G, Horton B, Lipschitz A, et al. Lifestyle outcomes, satisfaction, and attitudes of patients after  
14 liposuction: a Dallas experience. *Plast Reconstr Surg* 2006;117:1738-49.

15  
16 <sup>23</sup>Judge A, Arden NK, Price A, et al. Assessing patients for joint replacement: can pre-operative Oxford hip and  
17 knee scores be used to predict patient satisfaction following joint replacement surgery and to guide patient  
18 selection? *J Bone Joint Surg Br.* 2011;93(12):1660-4

19  
20 <sup>24</sup>Brander VA, Gondek S, Martin E, Stulberg SD. Pain and depression influence outcome 5 years after knee  
21 replacement surgery. *Clin Orthop Relat Res* 2007;464:21-6.

22  
23 <sup>27</sup>Mannion AF, Kämpfen S, Munzinger U, et al. The role of patient expectations in predicting outcome after  
24 total knee arthroplasty. *Arthritis Res Ther.* 2009;11(5):R139. Epub 2009 Sep 21.

25  
26 <sup>25</sup>Hamilton DF, Gaston P, Simpson AHRW. Is patient reporting of physical function accurate following total  
27 knee arthroplasty? *J Bone Joint Surg Br* 2012;11:1506-1510

28  
29 <sup>26</sup>Terwee CB, van der Slikke RMA, Van Lummel R, et al. Self-reported physical functioning was more influenced  
30 by pain than performance-based physical functioning in knee-osteoarthritis patients. *J Clin Epidemiol*  
31 2006;59:724-31.

32  
33 <sup>29</sup>Cleary PD, McNeill BJ. Patient satisfaction as an indicator of quality care. *Inquiry* 1988 25(1) 25-36.

34  
35 <sup>28</sup>Frampton L (ed) Exploring the quality challenges. *The clinical services journal* 2012;11(3) 22-25

36  
37 <sup>30</sup>Terwee CB, Bot SDM, de Boer MR, van der Windt DAWM, Knol DL, Dekker J, Bouter LM, de Vet HCW. Quality  
38 criteria were proposed for measurement properties of health status questionnaires. *Journal of Clinical  
39 Epidemiology, Volume 60, Issue 1, January 2007, Pages 34-42.*

40  
41 <sup>31</sup>Carr-Hill, R. A. The measurement of patient satisfaction. *Journal of Public Health Medicine* 1992;14(3):236-  
42 49.

43  
44 <sup>32</sup>Torjesen I. 2012. Patient satisfaction with NHS fell by 12% in 2011. *BMJ (Clinical Research Ed)* vol 344  
45 ppe4091.

46  
47 <sup>33</sup>Durvasula S, Lysonski S, Mehta S. Service encounters: the missing link between service quality perceptions  
48 and satisfaction. *J Applied business research* 2005;21(3):15-26

49  
50 <sup>34</sup>Baker PN, Deehan DJ, Lees D, et al. The effect of surgical factors on early patient-reported outcome measures  
51 (PROMS) following total knee replacement. *J Bone Joint Surg Br.* 2012;94(8):1058-66



STROBE 2007 (v4) Statement—Checklist of items that should be included in reports of *cohort studies*

| Section/Topic                | Item # | Recommendation                                                                                                                                                                       | Reported on page # |
|------------------------------|--------|--------------------------------------------------------------------------------------------------------------------------------------------------------------------------------------|--------------------|
| Title and abstract           | 1      | (a) Indicate the study's design with a commonly used term in the title or the abstract                                                                                               | 1,3                |
|                              |        | (b) Provide in the abstract an informative and balanced summary of what was done and what was found                                                                                  | 3                  |
| <b>Introduction</b>          |        |                                                                                                                                                                                      |                    |
| Background/rationale         | 2      | Explain the scientific background and rationale for the investigation being reported                                                                                                 | 4                  |
| Objectives                   | 3      | State specific objectives, including any prespecified hypotheses                                                                                                                     | 4                  |
| <b>Methods</b>               |        |                                                                                                                                                                                      |                    |
| Study design                 | 4      | Present key elements of study design early in the paper                                                                                                                              | 4,5                |
| Setting                      | 5      | Describe the setting, locations, and relevant dates, including periods of recruitment, exposure, follow-up, and data collection                                                      | 4,5                |
| Participants                 | 6      | (a) Give the eligibility criteria, and the sources and methods of selection of participants. Describe methods of follow-up                                                           | 4,5                |
|                              |        | (b) For matched studies, give matching criteria and number of exposed and unexposed                                                                                                  |                    |
| Variables                    | 7      | Clearly define all outcomes, exposures, predictors, potential confounders, and effect modifiers. Give diagnostic criteria, if applicable                                             | 4,5                |
| Data sources/<br>measurement | 8*     | For each variable of interest, give sources of data and details of methods of assessment (measurement). Describe comparability of assessment methods if there is more than one group | 4,5                |
| Bias                         | 9      | Describe any efforts to address potential sources of bias                                                                                                                            | 4,5                |
| Study size                   | 10     | Explain how the study size was arrived at                                                                                                                                            | 4,5                |
| Quantitative variables       | 11     | Explain how quantitative variables were handled in the analyses. If applicable, describe which groupings were chosen and why                                                         | 5                  |
| Statistical methods          | 12     | (a) Describe all statistical methods, including those used to control for confounding                                                                                                | 5,6                |
|                              |        | (b) Describe any methods used to examine subgroups and interactions                                                                                                                  |                    |
|                              |        | (c) Explain how missing data were addressed                                                                                                                                          | 5                  |
|                              |        | (d) If applicable, explain how loss to follow-up was addressed                                                                                                                       | 5                  |
|                              |        | (e) Describe any sensitivity analyses                                                                                                                                                |                    |
| <b>Results</b>               |        |                                                                                                                                                                                      |                    |

|                          |     |                                                                                                                                                                                                                                                                                                                                                                                                               |         |
|--------------------------|-----|---------------------------------------------------------------------------------------------------------------------------------------------------------------------------------------------------------------------------------------------------------------------------------------------------------------------------------------------------------------------------------------------------------------|---------|
| Participants             | 13* | (a) Report numbers of individuals at each stage of study—eg numbers potentially eligible, examined for eligibility, confirmed eligible, included in the study, completing follow-up, and analysed<br>(b) Give reasons for non-participation at each stage<br>(c) Consider use of a flow diagram                                                                                                               | 5       |
| Descriptive data         | 14* | (a) Give characteristics of study participants (eg demographic, clinical, social) and information on exposures and potential confounders<br>(b) Indicate number of participants with missing data for each variable of interest<br>(c) Summarise follow-up time (eg, average and total amount)                                                                                                                | 6,7     |
| Outcome data             | 15* | Report numbers of outcome events or summary measures over time                                                                                                                                                                                                                                                                                                                                                | 6       |
| Main results             | 16  | (a) Give unadjusted estimates and, if applicable, confounder-adjusted estimates and their precision (eg, 95% confidence interval). Make clear which confounders were adjusted for and why they were included<br>(b) Report category boundaries when continuous variables were categorized<br>(c) If relevant, consider translating estimates of relative risk into absolute risk for a meaningful time period | 6,7,8   |
| Other analyses           | 17  | Report other analyses done—eg analyses of subgroups and interactions, and sensitivity analyses                                                                                                                                                                                                                                                                                                                |         |
| <b>Discussion</b>        |     |                                                                                                                                                                                                                                                                                                                                                                                                               |         |
| Key results              | 18  | Summarise key results with reference to study objectives                                                                                                                                                                                                                                                                                                                                                      | 9       |
| <b>Limitations</b>       |     |                                                                                                                                                                                                                                                                                                                                                                                                               |         |
| Interpretation           | 20  | Give a cautious overall interpretation of results considering objectives, limitations, multiplicity of analyses, results from similar studies, and other relevant evidence                                                                                                                                                                                                                                    | 9,10,11 |
| Generalisability         | 21  | Discuss the generalisability (external validity) of the study results                                                                                                                                                                                                                                                                                                                                         | 9,10,11 |
| <b>Other information</b> |     |                                                                                                                                                                                                                                                                                                                                                                                                               |         |
| Funding                  | 22  | Give the source of funding and the role of the funders for the present study and, if applicable, for the original study on which the present article is based                                                                                                                                                                                                                                                 | 12      |

\*Give information separately for cases and controls in case-control studies and, if applicable, for exposed and unexposed groups in cohort and cross-sectional studies.

**Note:** An Explanation and Elaboration article discusses each checklist item and gives methodological background and published examples of transparent reporting. The STROBE checklist is best used in conjunction with this article (freely available on the Web sites of PLoS Medicine at <http://www.plosmedicine.org/>, Annals of Internal Medicine at <http://www.annals.org/>, and Epidemiology at <http://www.epidem.com/>). Information on the STROBE Initiative is available at [www.strobe-statement.org](http://www.strobe-statement.org).
